# Supplementary material for: Fused Alq3 derivatives: syntheses and photophysical characteristics
Source: Royal Society of Chemistry journal article supplement (doi:10.1039/c1jm12424b), 2011-01-01
Supplement: c1jm12424b.pdf [file c1jm12424b.pdf]

## Supplementary information

### Fused Alq<sub>3</sub> derivatives: syntheses and photophysical characteristics

Juha P. Heiskanen,<sup>a,\*</sup> Antti E. Tolkki,<sup>a</sup> Helge J. Lemmetyinen,<sup>a</sup> Osmo E. O. Hormi<sup>b</sup>

<sup>a</sup> Department of Chemistry and Bioengineering, Tampere University of Technology, P.O. Box 541, FI-33101, Tampere, Finland.

<sup>b</sup> Department of Chemistry, University of Oulu, P.O. Box 3000, FI-90014, University of Oulu, Finland.

\*juha.heiskanen@tut.fi

|                                                                                                                                        |          |
|----------------------------------------------------------------------------------------------------------------------------------------|----------|
| <sup>1</sup> H NMR, <sup>13</sup> C NMR and high resolution mass spectra for compounds <b>2–7</b> and <b>9–11</b>                      | pp 2–28  |
| <sup>1</sup> H NMR and high resolution mass spectra for complexes <b>12–14</b>                                                         | pp 29–35 |
| Fluorescence quantum yield determination in steady state, fluorescence decays obtained with TCSPC method and calculation of parameters | pp 36–39 |

<sup>1</sup>H NMR spectrum of 8-(benzyloxy)-4-chloroquinoline (2)

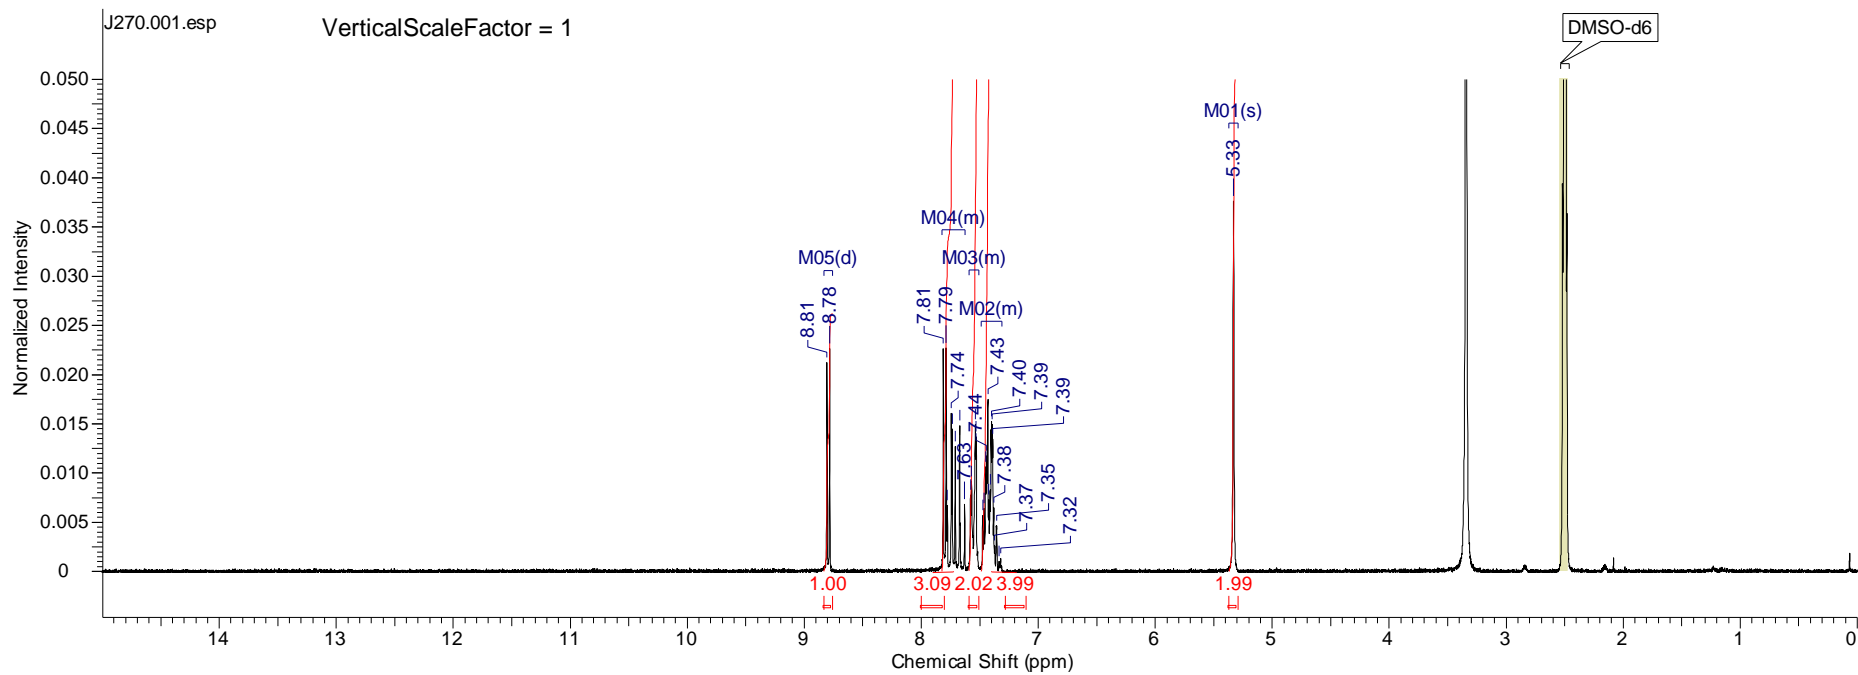

| No. | Shift1 (ppm) | H's | Type | J (Hz) | Multiplet1 | (ppm)          |
|-----|--------------|-----|------|--------|------------|----------------|
| 1   | 5.33         | 2   | s    | -      | M01        | [5.29 .. 5.37] |
| 2   | 7.40         | 4   | m    | -      | M02        | [7.31 .. 7.49] |
| 3   | 7.55         | 2   | m    | -      | M03        | [7.51 .. 7.59] |
| 4   | 7.73         | 3   | m    | -      | M04        | [7.62 .. 7.82] |
| 5   | 8.79         | 1   | d    | 4.70   | M05        | [8.76 .. 8.83] |

<sup>13</sup>C NMR spectrum of 8-(benzyloxy)-4-chloroquinoline (2)

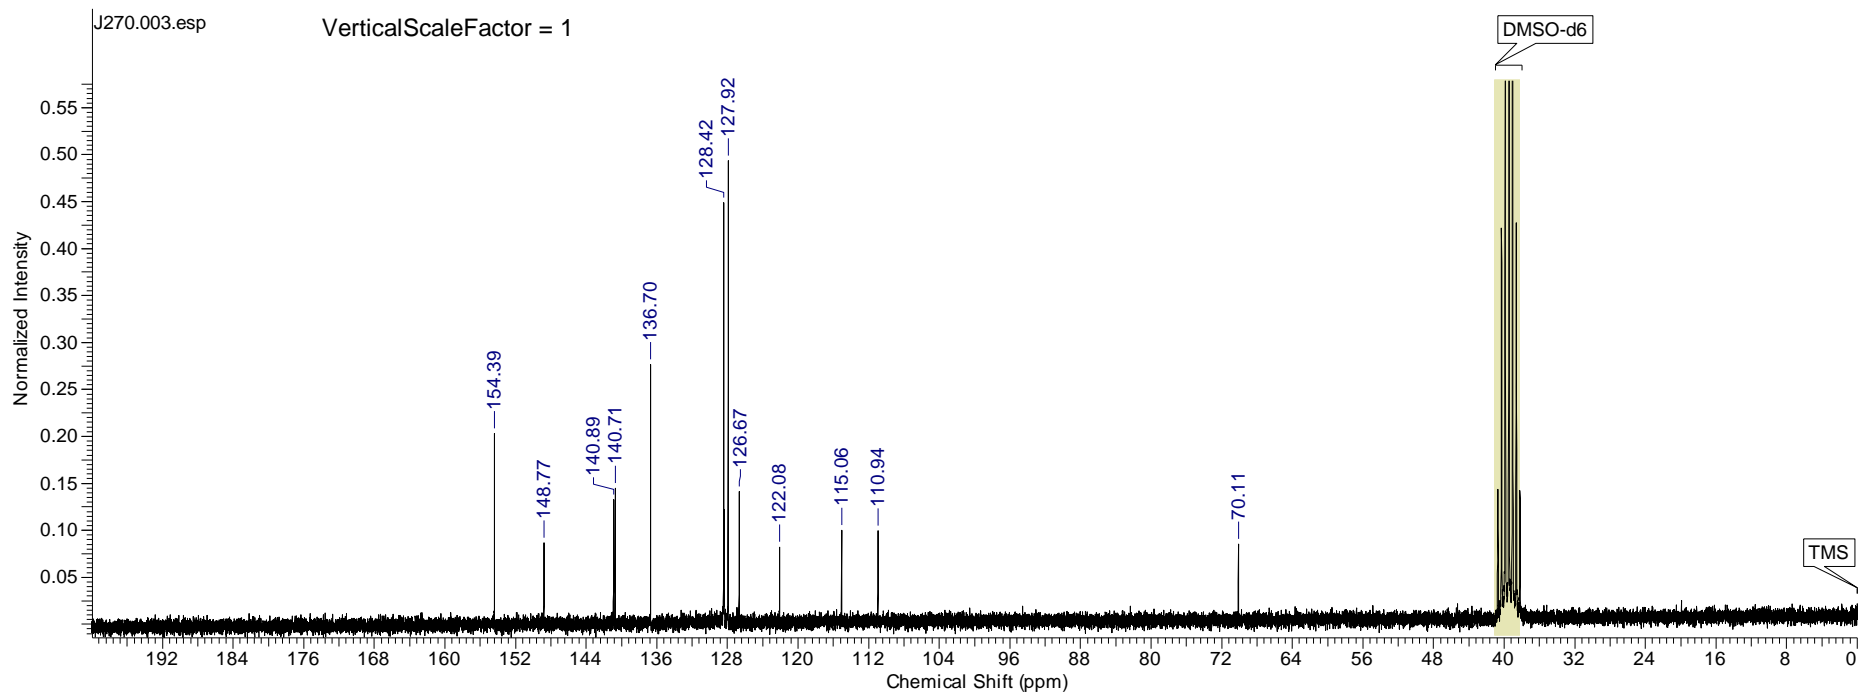

| No. | (ppm)  | (Hz)   | Height |
|-----|--------|--------|--------|-----|--------|--------|--------|-----|--------|--------|--------|-----|--------|--------|--------|
| 1   | 70.11  | 3528.2 | 0.0854 | 4   | 122.08 | 6143.5 | 0.0822 | 7   | 128.36 | 6459.3 | 0.1224 | 10  | 140.71 | 7080.7 | 0.1447 |
| 2   | 110.94 | 5583.0 | 0.0994 | 5   | 126.67 | 6374.2 | 0.1411 | 8   | 128.42 | 6462.2 | 0.4486 | 11  | 140.89 | 7090.2 | 0.1323 |
| 3   | 115.06 | 5789.9 | 0.0999 | 6   | 127.92 | 6437.3 | 0.4936 | 9   | 136.70 | 6878.9 | 0.2765 | 12  | 148.77 | 7486.7 | 0.0868 |
|     |        |        |        |     |        |        |        |     |        |        |        | 13  | 154.39 | 7769.5 | 0.2031 |

## HRMS of 8-(benzyloxy)-4-chloroquinoline (2)

### Elemental Composition Report

Single Mass Analysis (displaying only valid results)

Tolerance = 5.0 mDa / DBE: min = -0.5, max = 100.0

### Monoisotopic Mass, Odd and Even Electron Ions

116 formula(e) evaluated with 4 results within limits (up to 50 closest results for each mass)

|                 |                 |             |             |             |                       |
|-----------------|-----------------|-------------|-------------|-------------|-----------------------|
| Minimum:        |                 |             |             | -0.5        |                       |
| Maximum:        | 5.0             | 10.0        | 100.0       |             |                       |
| Mass            | Calc. Mass      | mDa         | PPM         | DBE         | Formula               |
| <b>270.0679</b> | 270.0681        | -0.1        | -0.5        | 15.0        | C19 H10 O2            |
|                 | <b>270.0686</b> | <b>-0.6</b> | <b>-2.4</b> | <b>10.5</b> | <b>C16 H13 N O Cl</b> |
|                 | 270.0662        | 1.8         | 6.6         | 7.5         | C14 H14 N O Na Cl     |
|                 | 270.0657        | 2.3         | 8.4         | 12.0        | C17 H11 O2 Na         |

### J217

LCT-24456 168 (3.366) AM (Cen,2, 70.00, Ar,5000,0.556,28); Sm (SG, 1x2.00); Sb (1,40.00 )  
270.0679 2.98e3

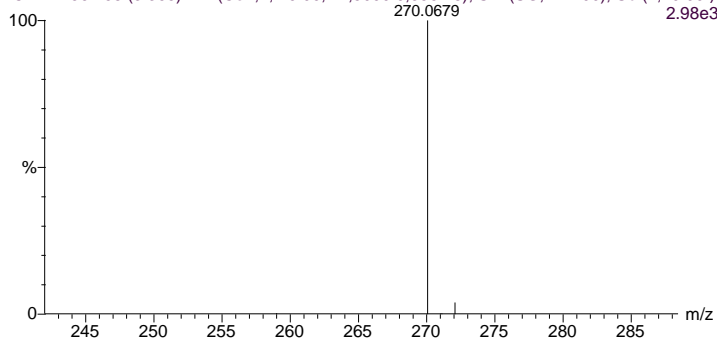

<sup>1</sup>H NMR spectrum of 4-benzyloxy-1*H*-indol[3,2-*c*]quinoline (**3**)

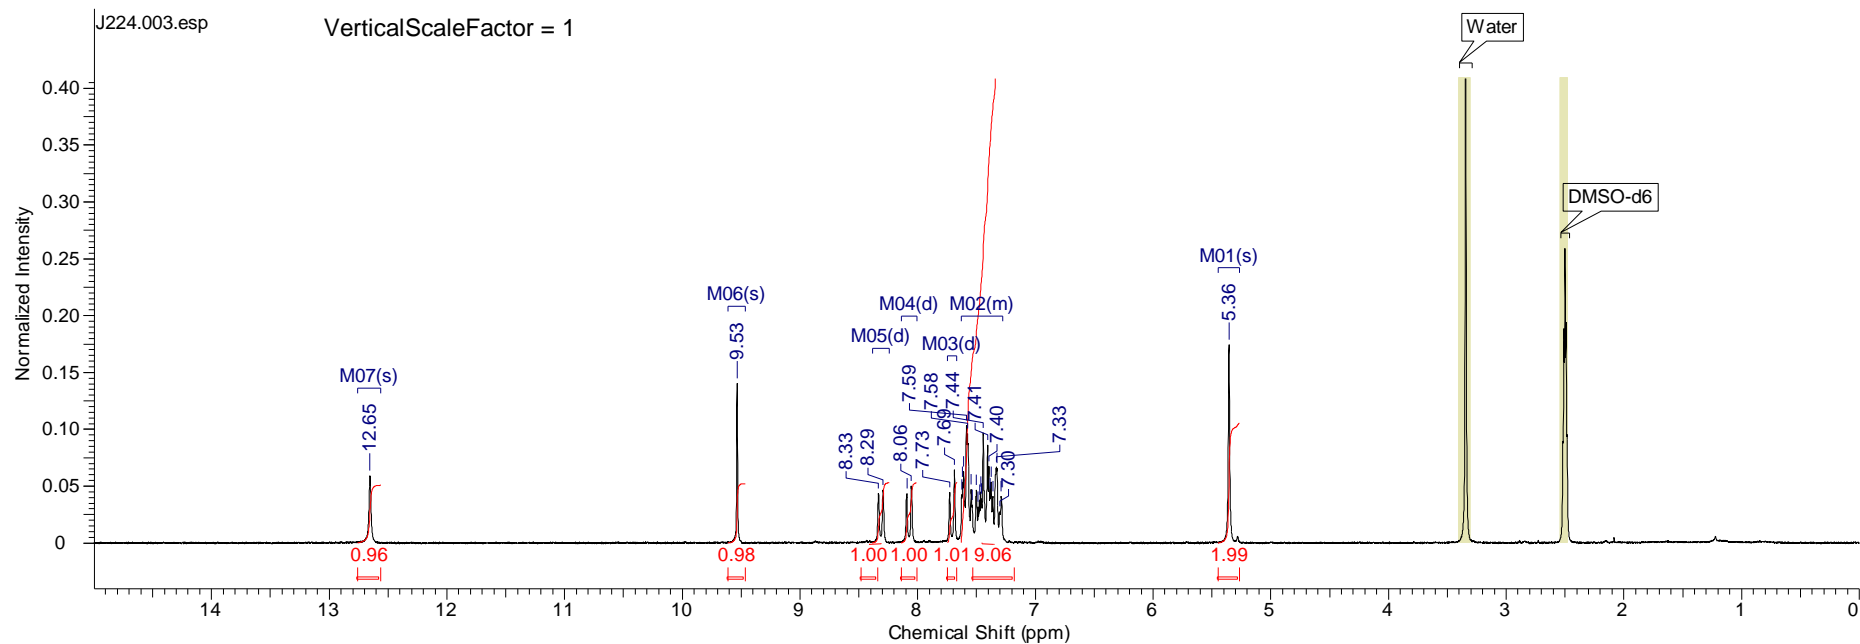

| No. | Shift1 (ppm) | H's | Type | J (Hz) | Multiplet1 | Connections | (ppm)            |
|-----|--------------|-----|------|--------|------------|-------------|------------------|
| 1   | 5.36         | 2   | s    | -      | M01        | -           | [5.26 .. 5.45]   |
| 2   | 7.46         | 10  | m    | -      | M02        | -           | [7.28 .. 7.63]   |
| 3   | 7.71         | 1   | d    | 8.02   | M03        | M05         | [7.67 .. 7.75]   |
| 4   | 8.07         | 1   | d    | 7.24   | M04        | -           | [8.01 .. 8.14]   |
| 5   | 8.31         | 1   | d    | 7.83   | M05        | M03         | [8.24 .. 8.38]   |
| 6   | 9.53         | 1   | s    | -      | M06        | -           | [9.46 .. 9.61]   |
| 7   | 12.65        | 1   | s    | -      | M07        | -           | [12.56 .. 12.76] |

<sup>13</sup>C NMR spectrum of 4-benzyloxy-11*H*-indol[3,2-*c*]quinoline (**3**)

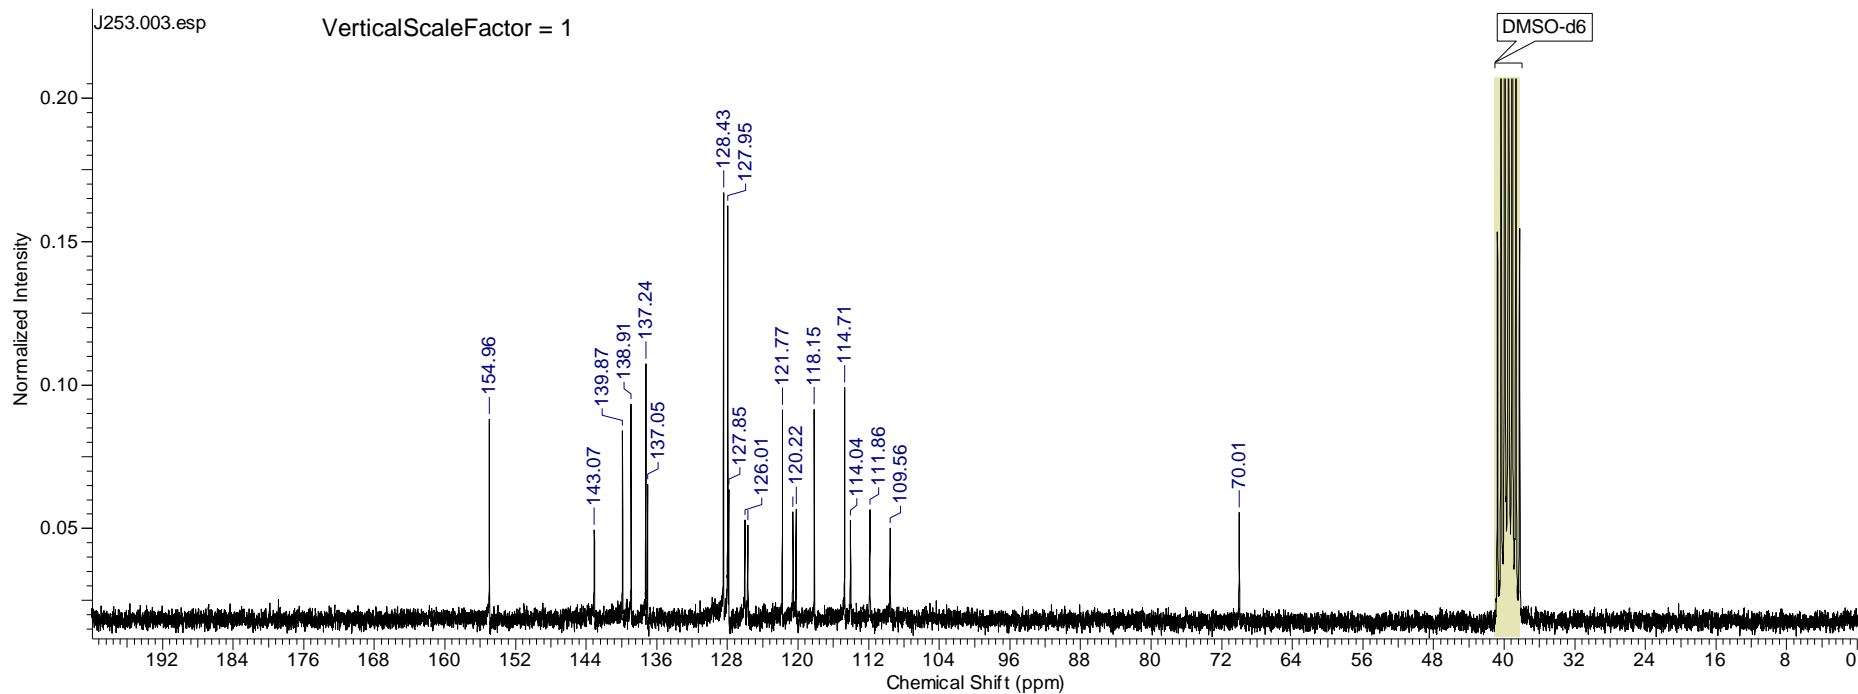

| No. | (ppm)  | (Hz)   | Height |
|-----|--------|--------|--------|-----|--------|--------|--------|-----|--------|--------|--------|-----|--------|--------|--------|
| 1   | 70.01  | 3523.3 | 0.0555 | 5   | 114.71 | 5772.5 | 0.0991 | 9   | 121.77 | 6127.9 | 0.0913 | 13  | 127.95 | 6439.0 | 0.1624 |
| 2   | 109.56 | 5513.5 | 0.0500 | 6   | 118.15 | 5945.6 | 0.0914 | 10  | 125.68 | 6324.5 | 0.0511 | 14  | 128.43 | 6463.2 | 0.1671 |
| 3   | 111.86 | 5629.1 | 0.0565 | 7   | 120.22 | 6049.8 | 0.0567 | 11  | 126.01 | 6341.0 | 0.0530 | 15  | 137.05 | 6896.7 | 0.0653 |
| 4   | 114.04 | 5738.8 | 0.0526 | 8   | 120.57 | 6067.4 | 0.0558 | 12  | 127.85 | 6433.8 | 0.0634 | 16  | 137.24 | 6906.3 | 0.1074 |
|     |        |        |        |     |        |        |        |     |        |        |        | 17  | 138.91 | 6990.3 | 0.0932 |
|     |        |        |        |     |        |        |        |     |        |        |        | 18  | 139.87 | 7038.7 | 0.0840 |
|     |        |        |        |     |        |        |        |     |        |        |        | 19  | 143.07 | 7199.7 | 0.0495 |
|     |        |        |        |     |        |        |        |     |        |        |        | 20  | 154.96 | 7798.0 | 0.0880 |

### HRMS of 4-benzyloxy-11*H*-indol[3,2-*c*]quinoline (3)

#### Elemental Composition Report

Single Mass Analysis (displaying only valid results)

Tolerance = 5.0 mDa / DBE: min = -0.5, max = 100.0

#### Monoisotopic Mass, Odd and Even Electron Ions

74 formula(e) evaluated with 2 results within limits (up to 50 closest results for each mass)

|                 |                 |            |            |             |                     |
|-----------------|-----------------|------------|------------|-------------|---------------------|
| Minimum:        |                 |            |            | -0.5        |                     |
| Maximum:        |                 | 5.0        | 10.0       | 100.0       |                     |
| Mass            | Calc. Mass      | mDa        | PPM        | DBE         | Formula             |
| <b>325.1347</b> | <b>325.1341</b> | <b>0.6</b> | <b>1.9</b> | <b>15.5</b> | <b>C22 H17 N2 O</b> |
|                 | 325.1317        | 3.0        | 9.3        | 12.5        | C20 H18 N2 O Na     |

#### J222

LCT-24491 184 (3.682) AM (Cen,2, 70.00, Ar,5000.0,556.28); Sm (SG, 1x2.00); Sb (1,40.00 )  
4.08e3

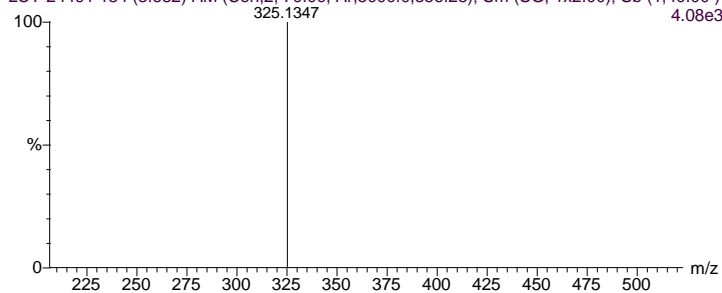

<sup>1</sup>H NMR spectrum of 11*H*-indolo[3,2-*c*]quinolin-4-ol (**4**)

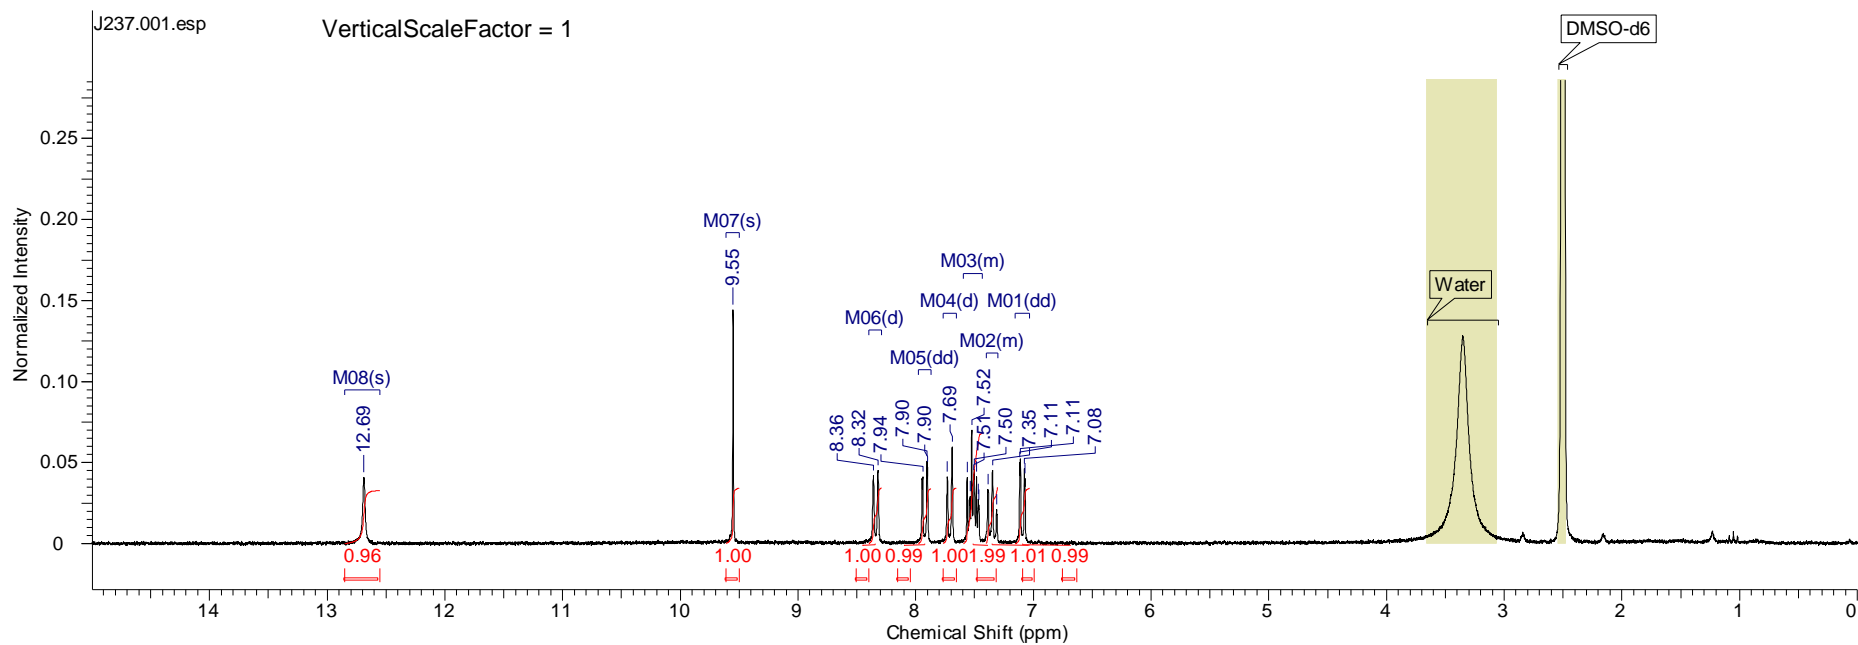

| No. | Shift1 (ppm) | H's | Type | J (Hz)     | Multiplet1 | Connections | (ppm)            |
|-----|--------------|-----|------|------------|------------|-------------|------------------|
| 1   | 7.09         | 1   | dd   | 7.73, 1.08 | M01        | M04, M05    | [7.03 .. 7.15]   |
| 2   | 7.35         | 1   | m    | -          | M02        | -           | [7.30 .. 7.40]   |
| 3   | 7.51         | 2   | m    | -          | M03        | -           | [7.43 .. 7.59]   |
| 4   | 7.71         | 1   | d    | 8.02       | M04        | M01         | [7.66 .. 7.77]   |
| 5   | 7.92         | 1   | dd   | 8.22, 1.17 | M05        | M06, M01    | [7.87 .. 7.98]   |
| 6   | 8.34         | 1   | d    | 7.83       | M06        | M05         | [8.29 .. 8.40]   |
| 7   | 9.55         | 1   | s    | -          | M07        | -           | [9.50 .. 9.61]   |
| 8   | 12.69        | 1   | s    | -          | M08        | -           | [12.55 .. 12.85] |



<sup>13</sup>C NMR spectrum of 11*H*-indolo[3,2-*c*]quinolin-4-ol (**4**)

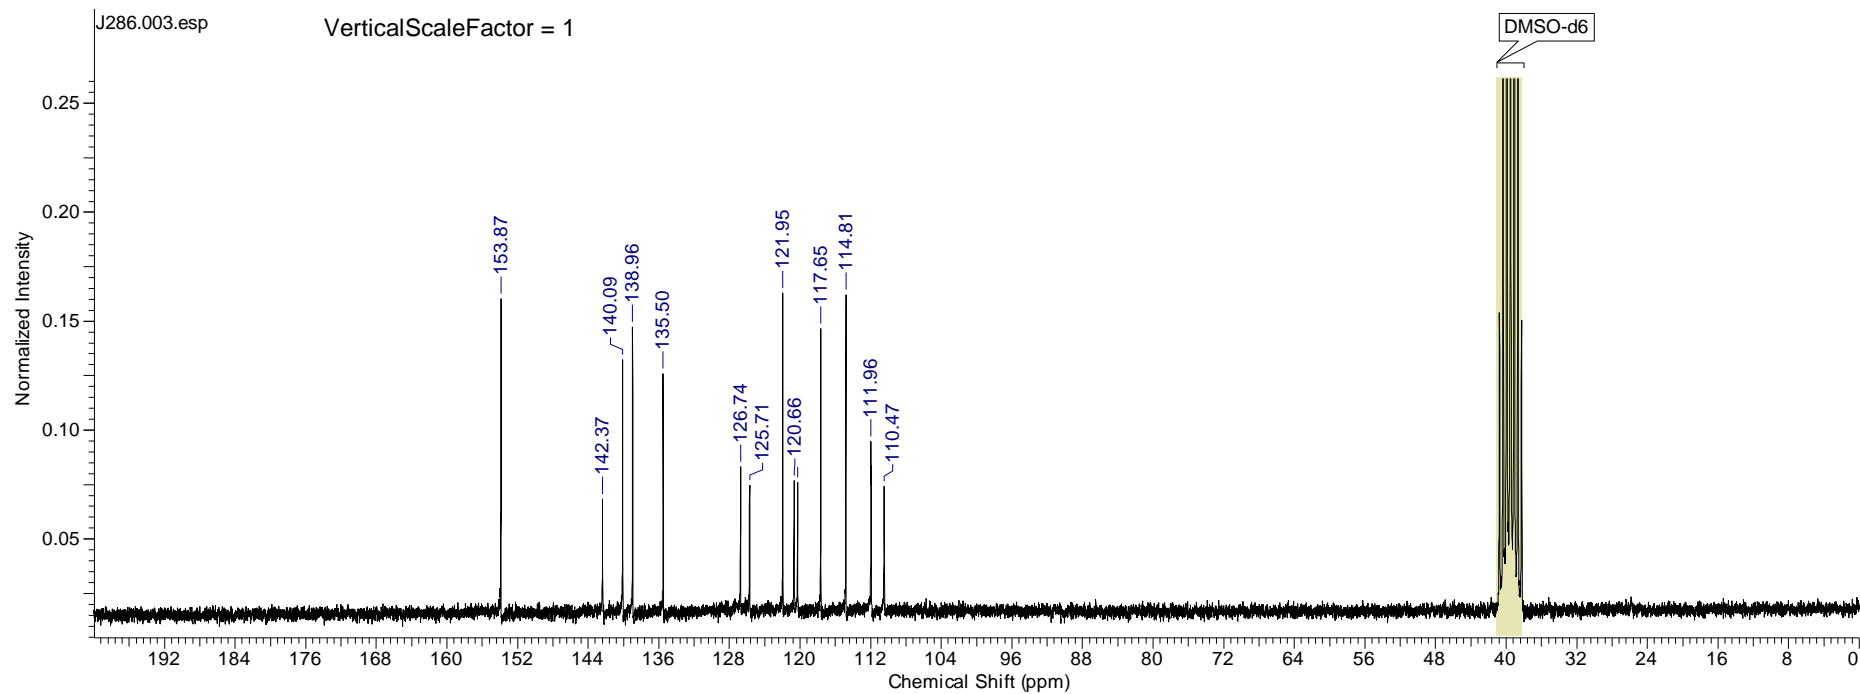

| No. | (ppm)  | (Hz)   | Height |
|-----|--------|--------|--------|-----|--------|--------|--------|-----|--------|--------|--------|-----|--------|--------|--------|
| 1   | 110.47 | 5559.4 | 0.0741 | 4   | 114.81 | 5777.6 | 0.1621 | 7   | 120.66 | 6071.8 | 0.0768 | 10  | 126.74 | 6377.7 | 0.0832 |
| 2   | 111.93 | 5632.8 | 0.0835 | 5   | 117.65 | 5920.3 | 0.1466 | 8   | 121.95 | 6136.7 | 0.1628 | 11  | 135.50 | 6818.6 | 0.1258 |
| 3   | 111.96 | 5634.2 | 0.0946 | 6   | 120.26 | 6052.0 | 0.0760 | 9   | 125.71 | 6326.0 | 0.0748 | 12  | 138.96 | 6992.8 | 0.1472 |
|     |        |        |        |     |        |        |        |     |        |        |        | 13  | 140.09 | 7049.7 | 0.1323 |
|     |        |        |        |     |        |        |        |     |        |        |        | 14  | 142.37 | 7164.5 | 0.0684 |
|     |        |        |        |     |        |        |        |     |        |        |        | 15  | 153.87 | 7743.3 | 0.1603 |

### HRMS of 11*H*-indolo[3,2-*c*]quinolin-4-ol (**4**)

#### Elemental Composition Report

Single Mass Analysis (displaying only valid results)

Tolerance = 5.0 mDa / DBE: min = -0.5, max = 100.0

#### Monoisotopic Mass, Even Electron Ions

53 formula(e) evaluated with 1 results within limits (up to 50 closest results for each mass)

|                 |                 |            |            |             |                     |
|-----------------|-----------------|------------|------------|-------------|---------------------|
| Minimum:        |                 |            |            | -0.5        |                     |
| Maximum:        |                 | 5.0        | 10.0       | 100.0       |                     |
| Mass            | Calc. Mass      | mDa        | PPM        | DBE         | Formula             |
| <b>235.0889</b> | <b>235.0871</b> | <b>1.7</b> | <b>7.4</b> | <b>11.5</b> | <b>C15 H11 N2 O</b> |

#### J226

Ict-24570 274 (5.483) AM (Cen,2, 60.00, Ar,5000.0,556.28); Sm (SG, 1x2.00); Sb (1,40.00 )

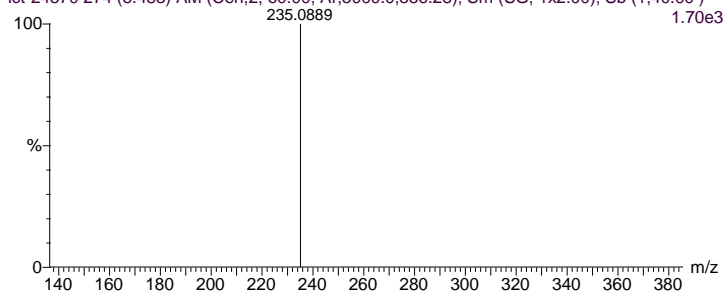

<sup>1</sup>H NMR spectrum of 4-((2-bromobenzyl)(methyl)amino)quinolin-8-yl 4-methylbenzenesulfonate (**5**)

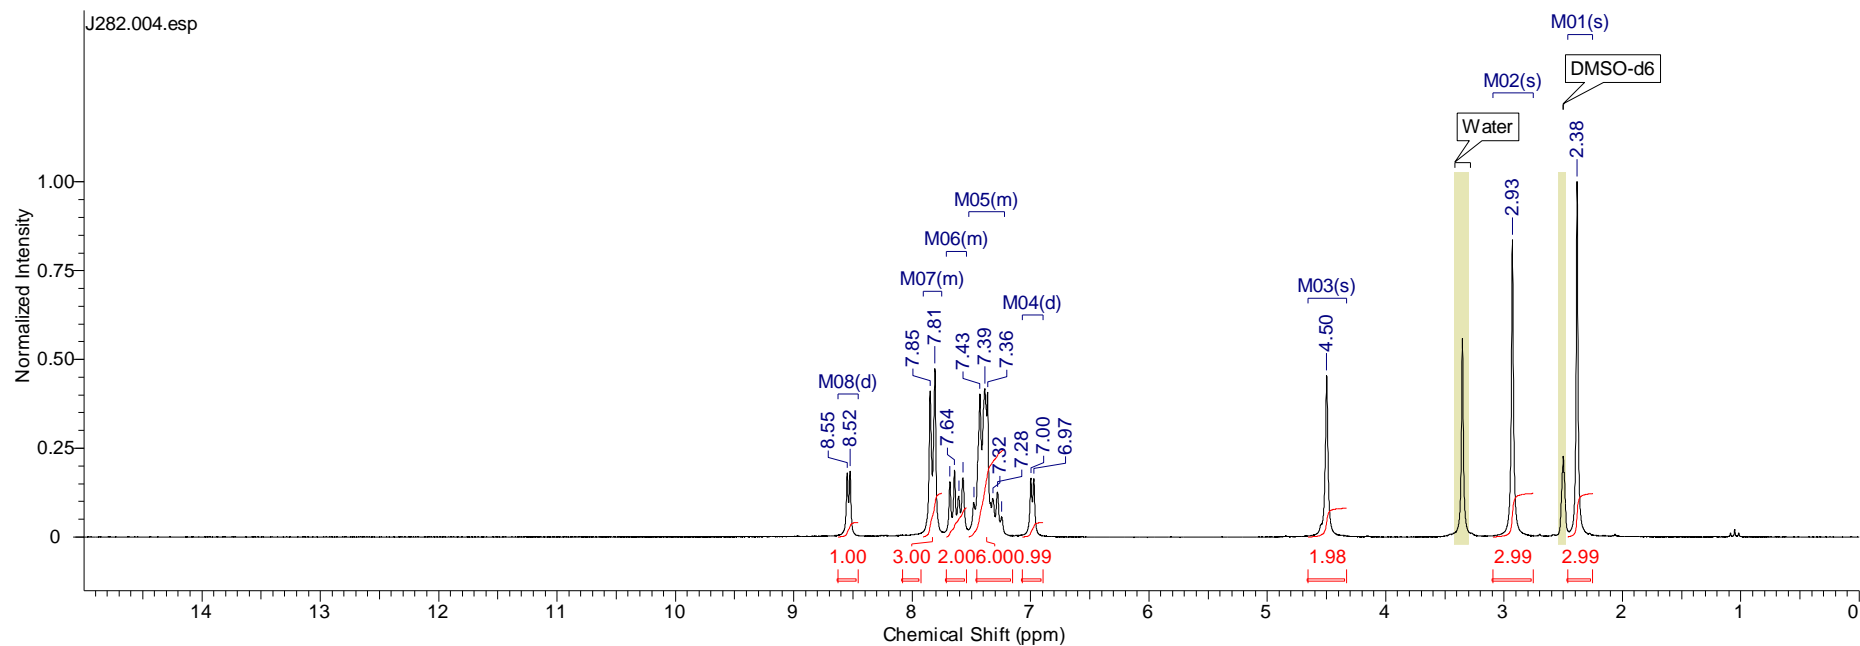

| No. | Shift1 (ppm) | H's | Type | J (Hz) | Multiplet1 | Connections | (ppm)          |
|-----|--------------|-----|------|--------|------------|-------------|----------------|
| 1   | 2.38         | 3   | s    | -      | M01        | -           | [2.25 .. 2.46] |
| 2   | 2.93         | 3   | s    | -      | M02        | -           | [2.75 .. 3.10] |
| 3   | 4.50         | 2   | s    | -      | M03        | -           | [4.33 .. 4.66] |
| 4   | 6.98         | 1   | d    | 5.09   | M04        | M08         | [6.90 .. 7.07] |
| 5   | 7.36         | 6   | m    | -      | M05        | -           | [7.22 .. 7.52] |
| 6   | 7.63         | 2   | m    | -      | M06        | -           | [7.54 .. 7.71] |
| 7   | 7.83         | 3   | m    | -      | M07        | -           | [7.75 .. 7.91] |
| 8   | 8.54         | 1   | d    | 4.89   | M08        | M04         | [8.46 .. 8.63] |

<sup>13</sup>C NMR spectrum of 4-((2-bromobenzyl)(methyl)amino)quinolin-8-yl 4-methylbenzenesulfonate (**5**)

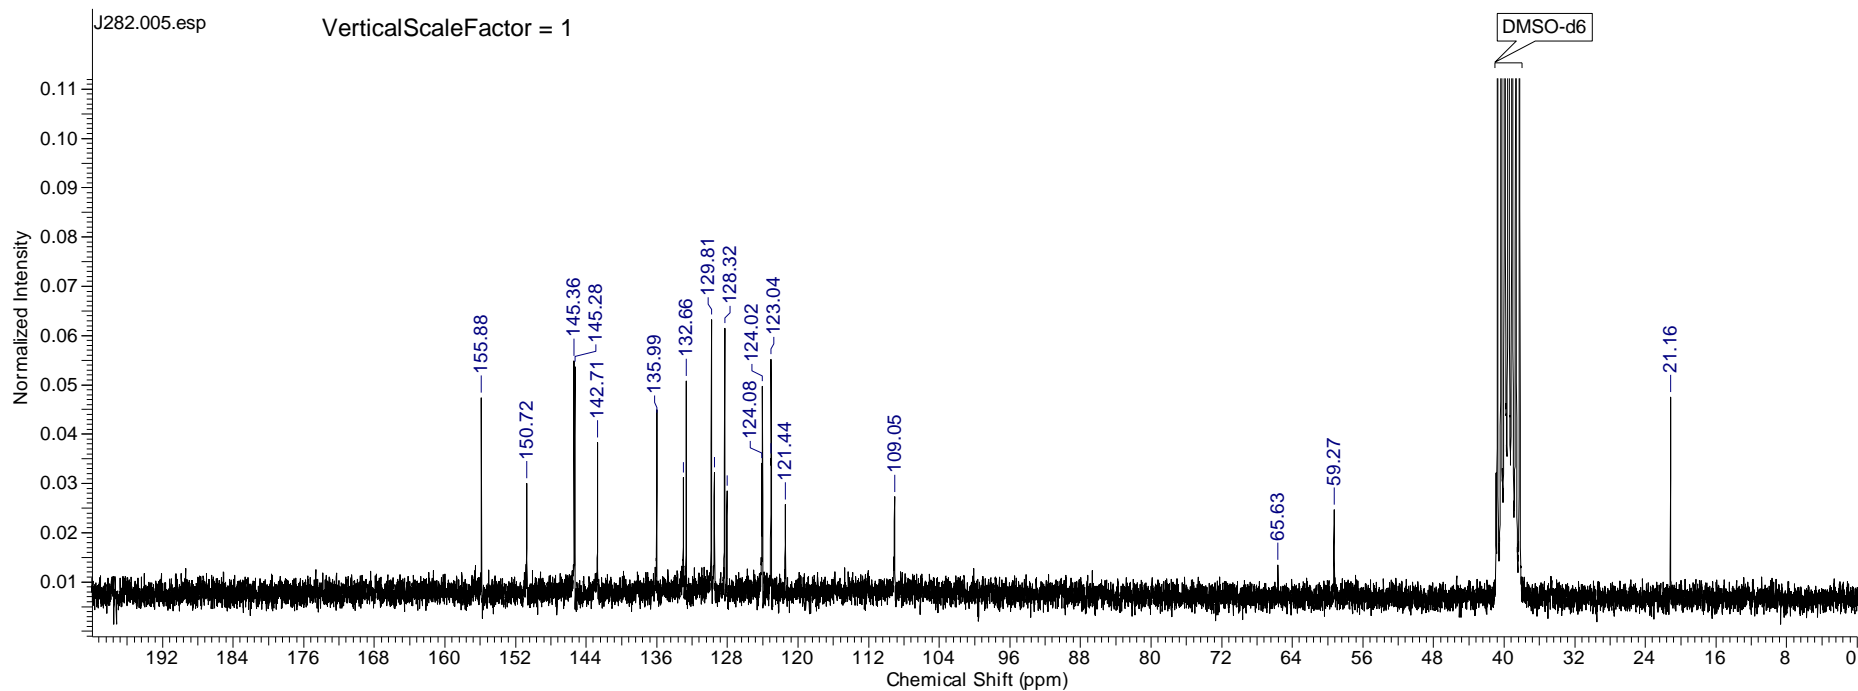

| No. | (ppm)  | (Hz)   | Height |
|-----|--------|--------|--------|-----|--------|--------|--------|-----|--------|--------|--------|-----|--------|--------|--------|
| 1   | 21.16  | 1064.7 | 0.0475 | 6   | 123.04 | 6191.8 | 0.0552 | 11  | 128.32 | 6457.3 | 0.0615 | 16  | 132.98 | 6692.1 | 0.0312 |
| 2   | 59.27  | 2982.6 | 0.0247 | 7   | 123.07 | 6193.2 | 0.0350 | 12  | 129.45 | 6514.2 | 0.0303 | 17  | 135.99 | 6843.6 | 0.0434 |
| 3   | 65.63  | 3302.5 | 0.0134 | 8   | 124.02 | 6240.9 | 0.0497 | 13  | 129.49 | 6516.4 | 0.0323 | 18  | 142.71 | 7181.7 | 0.0383 |
| 4   | 109.05 | 5487.9 | 0.0272 | 9   | 124.08 | 6244.2 | 0.0341 | 14  | 129.81 | 6532.5 | 0.0632 | 19  | 145.28 | 7310.9 | 0.0536 |
| 5   | 121.44 | 6111.1 | 0.0257 | 10  | 128.06 | 6444.1 | 0.0285 | 15  | 132.66 | 6675.6 | 0.0507 | 20  | 145.36 | 7314.9 | 0.0549 |
|     |        |        |        |     |        |        |        |     |        |        |        | 21  | 150.72 | 7584.9 | 0.0300 |
|     |        |        |        |     |        |        |        |     |        |        |        | 22  | 155.88 | 7844.2 | 0.0474 |

### HRMS of 4-((2-bromobenzyl)(methyl)amino)quinolin-8-yl 4-methylbenzenesulfonate (**5**)

#### Elemental Composition Report

Single Mass Analysis (displaying only valid results)

Tolerance = 5.0 mDa / DBE: min = -0.5, max = 100.0

Monoisotopic Mass, Even Electron Ions

822 formula(e) evaluated with 11 results within limits (up to 50 closest results for each mass)

| Mass            | Calc. Mass      | mDa         | PPM         | DBE         | Formula                   |
|-----------------|-----------------|-------------|-------------|-------------|---------------------------|
| <b>497.0531</b> | <b>497.0535</b> | <b>-0.3</b> | <b>-0.6</b> | <b>14.5</b> | <b>C24 H22 N2 O3 S Br</b> |
| 497.0528        |                 | 0.3         | 0.7         | 5.5         | C16 H26 N4 O5 S2 Br       |
| 497.0541        |                 | -1.0        | -2.0        | 23.5        | C32 H18 O Br              |
| 497.0560        |                 | -2.8        | -5.7        | 10.5        | C20 H22 N2 O8 Br          |
| 497.0503        |                 | 2.8         | 5.7         | 9.5         | C20 H26 N4 S3 Br          |
| 497.0562        |                 | -3.0        | -6.1        | 0.5         | C13 H30 N4 O5 S3 Br       |
| 497.0501        |                 | 3.1         | 6.1         | 19.5        | C27 H18 N2 O3 Br          |
| 497.0568        |                 | -3.7        | -7.4        | 9.5         | C21 H26 N2 O3 S2 Br       |
| 497.0494        |                 | 3.7         | 7.4         | 10.5        | C19 H22 N4 O5 S Br        |
| 497.0490        |                 | 4.2         | 8.4         | 4.5         | C19 H30 O4 S3 Br          |
| 497.0575        |                 | -4.3        | -8.7        | 18.5        | C29 H22 O S Br            |

#### J264

lct-24913 361 (7.226) AM (Cen,2, 80.00, Ar,5000.0,609.28); Sm (SG, 1x2.00); Sb (4,40.00); S

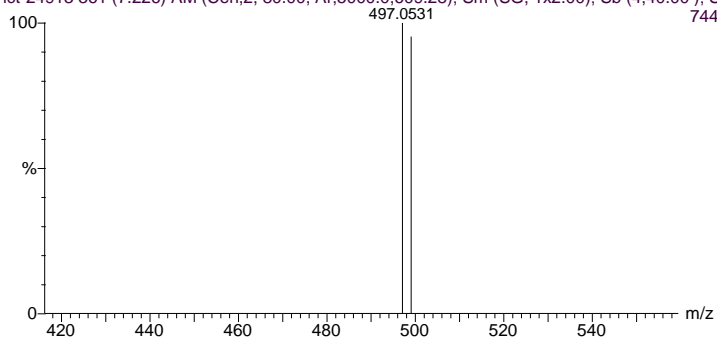

<sup>1</sup>H NMR spectrum of 5-methyl-5,6-dihydrodibenzo[*c,h*][1,6]naphthyridin-1-yl 4-methylbenzenesulfonate (**6**)

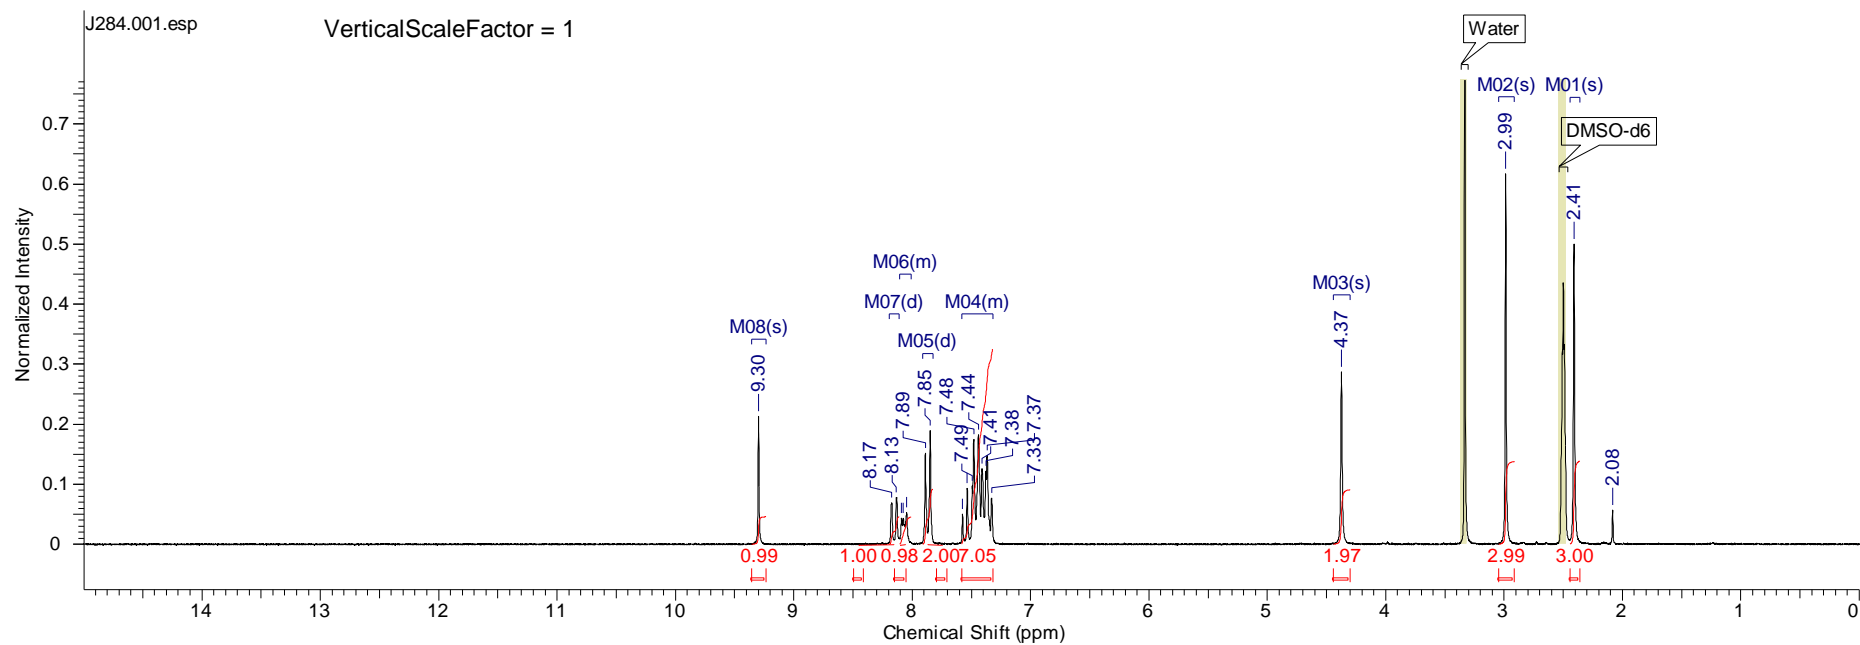

| No. | Shift1 (ppm) | H's | Type | J (Hz) | Multiplet1 | (ppm)          |
|-----|--------------|-----|------|--------|------------|----------------|
| 1   | 2.41         | 3   | s    | -      | M01        | [2.36 .. 2.44] |
| 2   | 2.99         | 3   | s    | -      | M02        | [2.91 .. 3.05] |
| 3   | 4.37         | 2   | s    | -      | M03        | [4.30 .. 4.44] |
| 4   | 7.44         | 7   | m    | -      | M04        | [7.32 .. 7.58] |
| 5   | 7.87         | 2   | d    | 8.22   | M05        | [7.83 .. 7.91] |
| 6   | 8.07         | 1   | m    | -      | M06        | [8.01 .. 8.11] |
| 7   | 8.15         | 1   | d    | 7.63   | M07        | [8.11 .. 8.20] |
| 8   | 9.30         | 1   | s    | -      | M08        | [9.24 .. 9.35] |

$^{13}\text{C}$  NMR spectrum of 5-methyl-5,6-dihydrodibenzo[*c,h*][1,6]naphthyridin-1-yl 4-methylbenzenesulfonate (**6**)

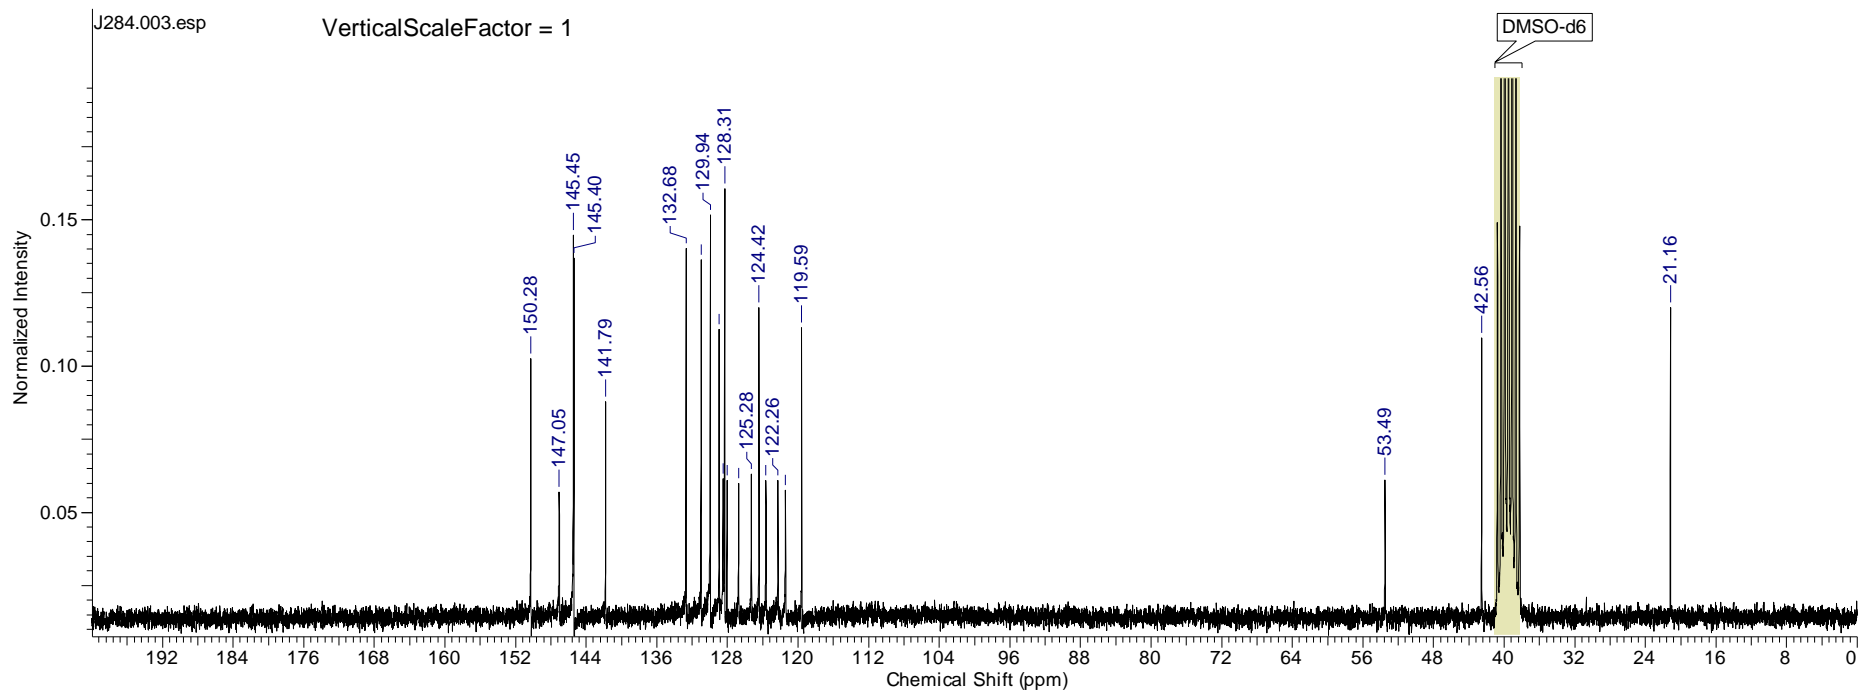

| No. | (ppm)  | (Hz)   | Height |
|-----|--------|--------|--------|-----|--------|--------|--------|-----|--------|--------|--------|-----|--------|--------|--------|
| 1   | 21.16  | 1065.0 | 0.1200 | 6   | 122.26 | 6152.5 | 0.0609 | 11  | 128.03 | 6443.0 | 0.0609 | 16  | 130.98 | 6591.2 | 0.1362 |
| 2   | 42.56  | 2141.6 | 0.1097 | 7   | 123.62 | 6221.1 | 0.0608 | 12  | 128.31 | 6456.9 | 0.1606 | 17  | 132.68 | 6677.0 | 0.1401 |
| 3   | 53.49  | 2691.8 | 0.0611 | 8   | 124.42 | 6261.1 | 0.1200 | 13  | 128.49 | 6466.1 | 0.0615 | 18  | 141.79 | 7135.2 | 0.0878 |
| 4   | 119.59 | 6017.9 | 0.1131 | 9   | 125.28 | 6304.4 | 0.0630 | 14  | 128.93 | 6488.1 | 0.1126 | 19  | 145.40 | 7316.7 | 0.1369 |
| 5   | 121.43 | 6110.7 | 0.0576 | 10  | 126.72 | 6377.0 | 0.0599 | 15  | 129.94 | 6539.1 | 0.1516 | 20  | 145.45 | 7319.7 | 0.1447 |
|     |        |        |        |     |        |        |        |     |        |        |        | 21  | 147.05 | 7400.0 | 0.0570 |
|     |        |        |        |     |        |        |        |     |        |        |        | 22  | 150.28 | 7562.5 | 0.1026 |

### HRMS of 5-methyl-5,6-dihydrodibenzo[*c,h*][1,6]naphthyridin-1-yl 4-methylbenzenesulfonate (6)

#### Elemental Composition Report

Single Mass Analysis (displaying only valid results)

Tolerance = 5.0 mDa / DBE: min = -0.5, max = 100.0

Monoisotopic Mass, Odd and Even Electron Ions

338 formula(e) evaluated with 11 results within limits (up to 50 closest results for each mass)

| Mass            | Calc. Mass      | mDa        | PPM        | DBE         | Formula                   |
|-----------------|-----------------|------------|------------|-------------|---------------------------|
| <b>439.1104</b> | 439.1109        | -0.5       | -1.1       | 28.0        | C32 H13 N3                |
|                 | 439.1099        | 0.6        | 1.3        | 24.5        | C32 H16 O Na              |
|                 | 439.1116        | -1.2       | -2.7       | 18.5        | C26 H19 N2 O3 S           |
|                 | <b>439.1092</b> | <b>1.2</b> | <b>2.8</b> | <b>15.5</b> | <b>C24 H20 N2 O3 Na S</b> |
|                 | 439.1119        | -1.5       | -3.4       | 20.0        | C27 H18 N3 Na S           |
|                 | 439.1123        | -1.8       | -4.2       | 27.5        | C34 H15 O                 |
|                 | 439.1085        | 1.9        | 4.3        | 25.0        | C30 H14 N3 Na             |
|                 | 439.1083        | 2.2        | 5.0        | 23.5        | C29 H15 N2 O3             |
|                 | 439.1133        | -2.8       | -6.4       | 19.5        | C29 H20 O Na S            |
|                 | 439.1143        | -3.9       | -8.8       | 23.0        | C29 H17 N3 S              |
|                 | 439.1059        | 4.6        | 10.4       | 20.5        | C27 H16 N2 O3 Na          |

#### J273

LCT-24948 289 (5.786) AM (Cen,2, 75.00, Ar,5000.0,609.28); Sm (SG, 1x2.00); Sb (4,40.00)

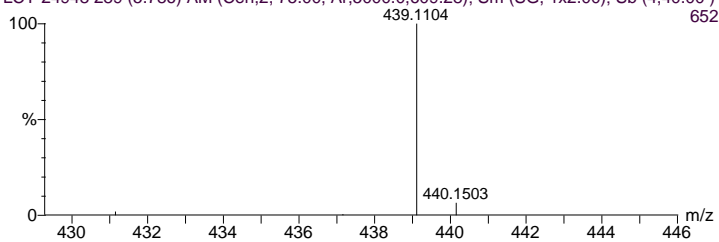



<sup>1</sup>H NMR spectrum of 5-methyl-5,6-dihydrodibenzo[*c,h*][1,6]naphthyridin-1-ol (**7**)

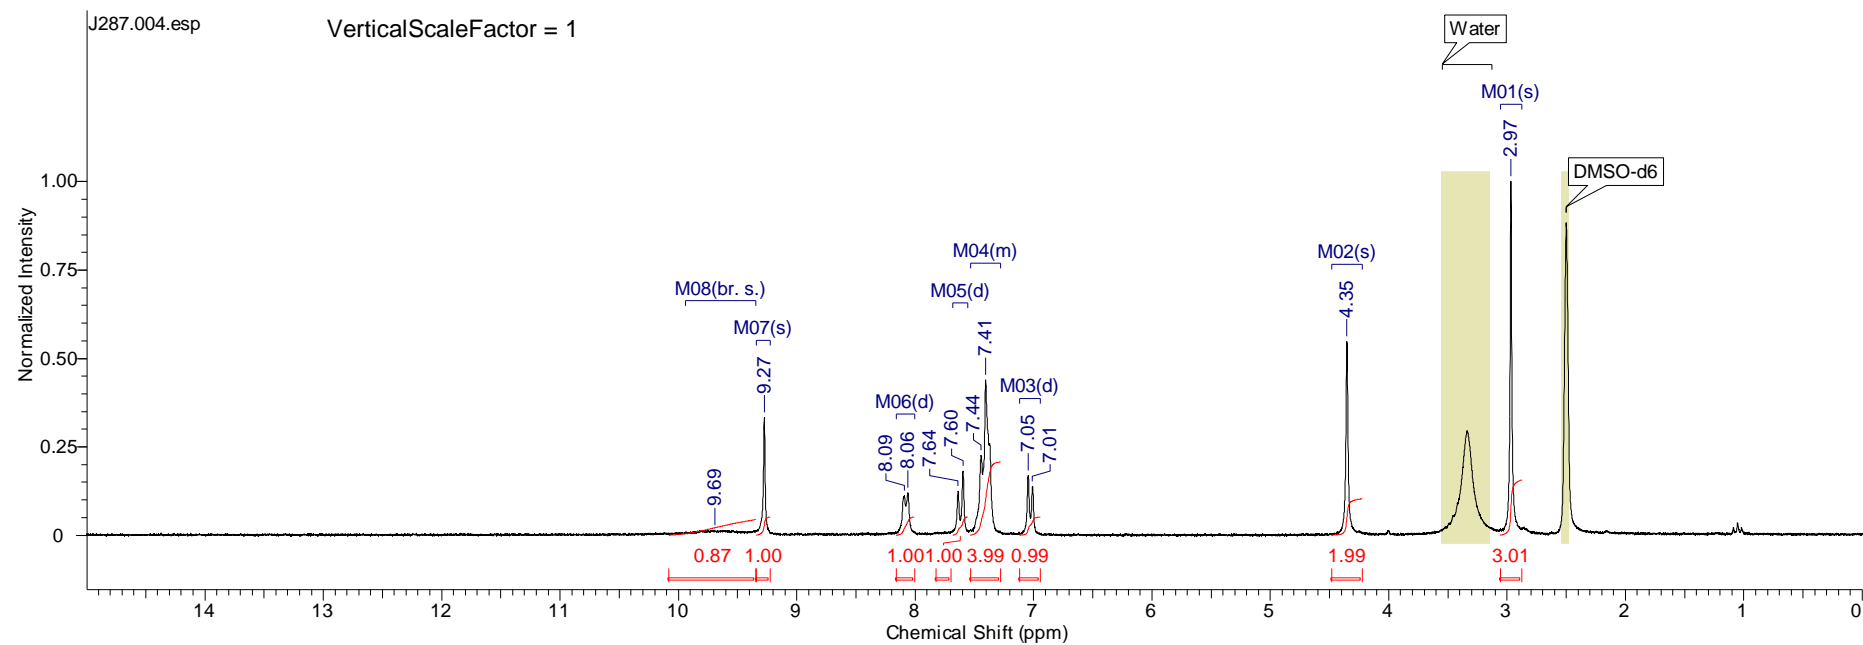

| No. | Shift1 (ppm) | H's | Type   | J (Hz) | Multiplet1 | (ppm)          |
|-----|--------------|-----|--------|--------|------------|----------------|
| 1   | 2.97         | 3   | s      | -      | M01        | [2.88 .. 3.05] |
| 2   | 4.35         | 2   | s      | -      | M02        | [4.22 .. 4.48] |
| 3   | 7.03         | 1   | d      | 7.43   | M03        | [6.94 .. 7.12] |
| 4   | 7.42         | 4   | m      | -      | M04        | [7.28 .. 7.53] |
| 5   | 7.62         | 1   | d      | 8.22   | M05        | [7.56 .. 7.68] |
| 6   | 8.08         | 1   | d      | 6.06   | M06        | [8.01 .. 8.16] |
| 7   | 9.27         | 1   | s      | -      | M07        | [9.22 .. 9.34] |
| 8   | 9.69         | 1   | br. s. | -      | M08        | [9.34 .. 9.94] |

<sup>13</sup>C NMR spectrum of 5-methyl-5,6-dihydrodibenzo[*c,h*][1,6]naphthyridin-1-ol (**7**)

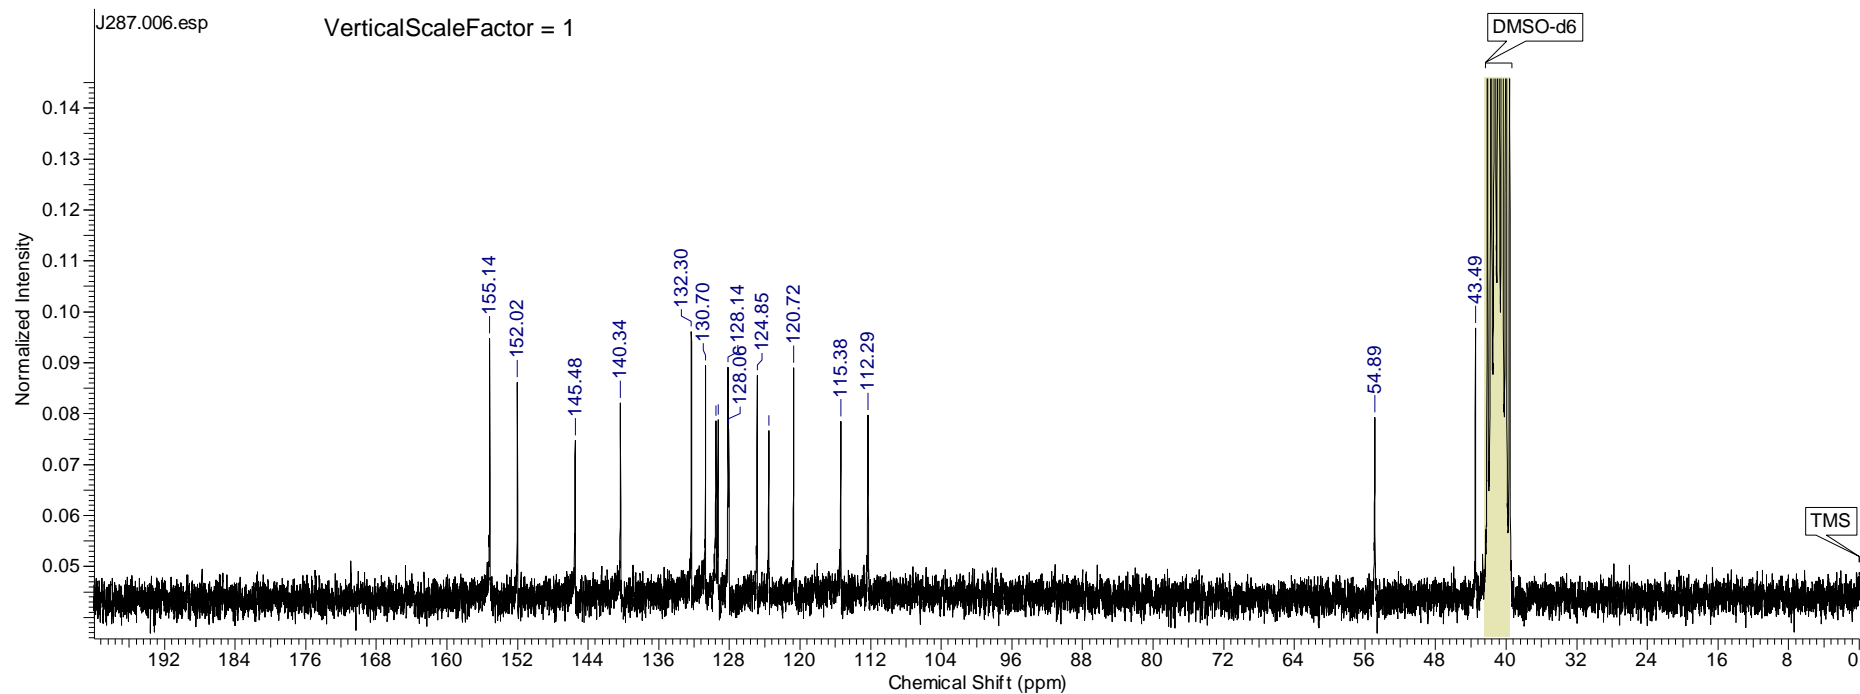

| No. | (ppm)  | (Hz)   | Height |
|-----|--------|--------|--------|-----|--------|--------|--------|-----|--------|--------|--------|-----|--------|--------|--------|
| 1   | 43.49  | 2188.3 | 0.0968 | 5   | 120.72 | 6074.9 | 0.0889 | 9   | 128.14 | 6448.3 | 0.0891 | 13  | 132.30 | 6657.7 | 0.0961 |
| 2   | 54.89  | 2762.0 | 0.0792 | 6   | 123.54 | 6216.9 | 0.0767 | 10  | 129.28 | 6505.9 | 0.0788 | 14  | 140.34 | 7062.3 | 0.0821 |
| 3   | 112.29 | 5650.9 | 0.0797 | 7   | 124.85 | 6282.9 | 0.0875 | 11  | 129.52 | 6517.6 | 0.0786 | 15  | 145.48 | 7320.9 | 0.0748 |
| 4   | 115.38 | 5806.0 | 0.0785 | 8   | 128.06 | 6444.3 | 0.0769 | 12  | 130.70 | 6577.4 | 0.0894 | 16  | 152.02 | 7649.9 | 0.0862 |
|     |        |        |        |     |        |        |        |     |        |        |        | 17  | 155.14 | 7807.3 | 0.0947 |

### HRMS of 5-methyl-5,6-dihydrodibenzo[*c,h*][1,6]naphthyridin-1-ol (7)

#### Elemental Composition Report

Single Mass Analysis (displaying only valid results)

Tolerance = 5.0 mDa / DBE: min = -0.5, max = 100.0

#### Monoisotopic Mass, Odd and Even Electron Ions

64 formula(e) evaluated with 2 results within limits (up to 50 closest results for each mass)

|                 |                 |             |             |             |                     |
|-----------------|-----------------|-------------|-------------|-------------|---------------------|
| Minimum:        |                 |             |             | -0.5        |                     |
| Maximum:        |                 | 5.0         | 10.0        | 100.0       |                     |
| Mass            | Calc. Mass      | mDa         | PPM         | DBE         | Formula             |
| <b>263.1181</b> | <b>263.1184</b> | <b>-0.3</b> | <b>-1.3</b> | <b>11.5</b> | <b>C17 H15 N2 O</b> |
|                 | 263.1160        | 2.1         | 7.9         | 8.5         | C15 H16 N2 O Na     |

#### J280

LCT-24998 14 (0.281) AM (Cen,2, 90.00, Ar,5000.0,609.28); Sm (SG, 1x2.00); Sb (4,40.00 )

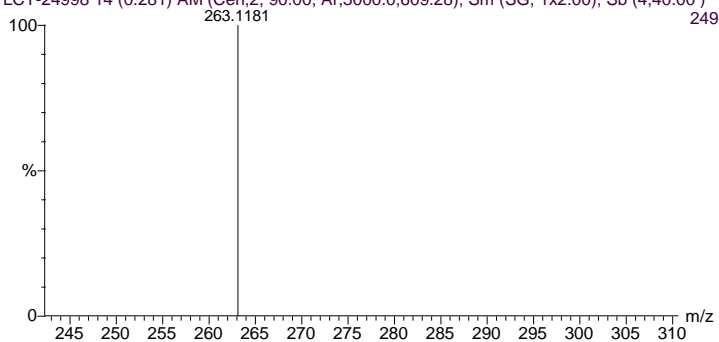

<sup>1</sup>H NMR spectrum of 4-(2-bromobenzyloxy)quinolin-8-yl 4-methylbenzenesulfonate (**9**)

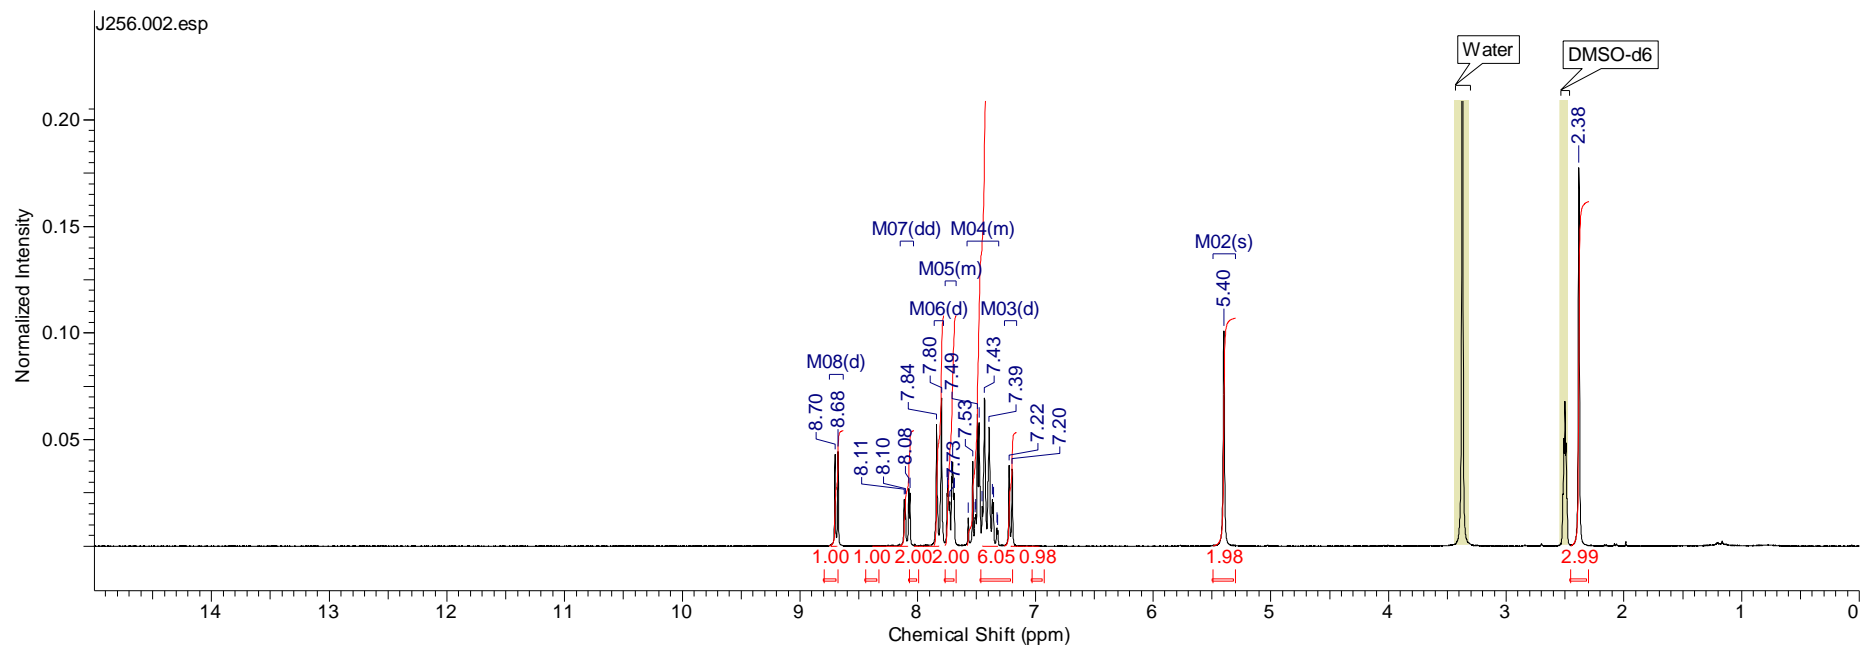

| No. | Shift1 (ppm) | H's | Type | J (Hz)     | Multiplet1 | Connections | (ppm)          |
|-----|--------------|-----|------|------------|------------|-------------|----------------|
| 1   | 2.38         | 3   | s    | -          | M01        | -           | [2.30 .. 2.45] |
| 2   | 5.40         | 2   | s    | -          | M02        | -           | [5.30 .. 5.49] |
| 3   | 7.21         | 1   | d    | 5.28       | M03        | M08         | [7.16 .. 7.26] |
| 4   | 7.44         | 6   | m    | -          | M04        | -           | [7.31 .. 7.58] |
| 5   | 7.72         | 2   | m    | -          | M05        | -           | [7.67 .. 7.77] |
| 6   | 7.82         | 2   | d    | 8.22       | M06        | -           | [7.78 .. 7.86] |
| 7   | 8.09         | 1   | dd   | 7.73, 2.05 | M07        | -           | [8.04 .. 8.15] |
| 8   | 8.69         | 1   | d    | 5.28       | M08        | M03         | [8.63 .. 8.75] |

<sup>13</sup>C NMR spectrum of 4-(2-bromobenzyloxy)quinolin-8-yl 4-methylbenzenesulfonate (**9**)

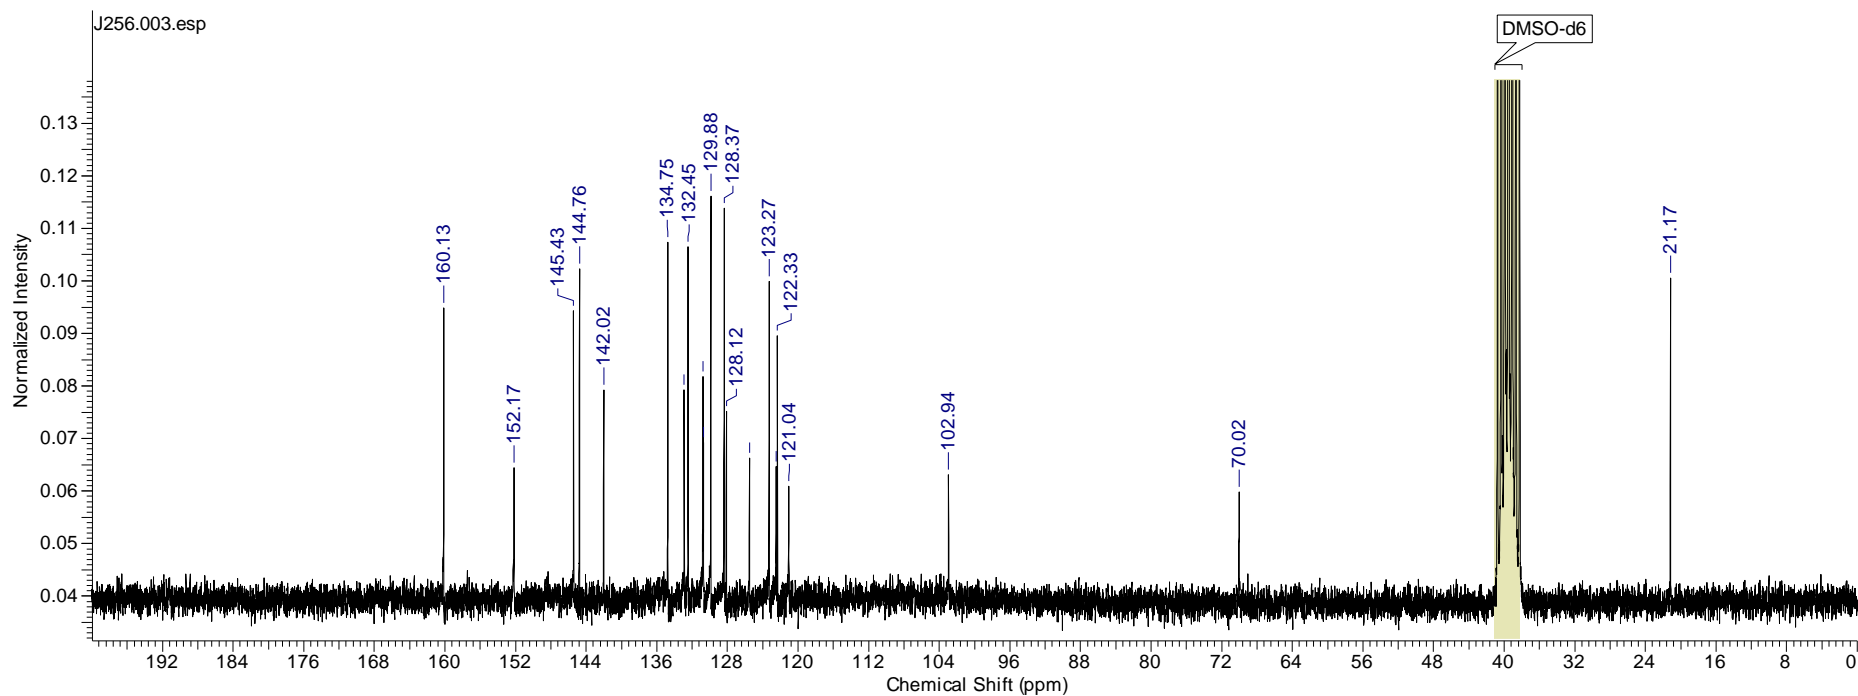

| No. | (ppm)  | (Hz)   | Height |
|-----|--------|--------|--------|-----|--------|--------|--------|-----|--------|--------|--------|-----|--------|--------|--------|
| 1   | 21.17  | 1065.4 | 0.1005 | 6   | 122.48 | 6163.5 | 0.0646 | 11  | 129.88 | 6535.8 | 0.1162 | 16  | 134.75 | 6780.8 | 0.1074 |
| 2   | 70.02  | 3523.7 | 0.0598 | 7   | 123.27 | 6203.5 | 0.0999 | 12  | 130.70 | 6577.3 | 0.0693 | 17  | 142.02 | 7146.9 | 0.0793 |
| 3   | 102.94 | 5180.1 | 0.0631 | 8   | 125.50 | 6315.7 | 0.0662 | 13  | 130.77 | 6580.9 | 0.0817 | 18  | 144.76 | 7284.8 | 0.1023 |
| 4   | 121.04 | 6090.9 | 0.0609 | 9   | 128.12 | 6447.4 | 0.0752 | 14  | 132.45 | 6665.3 | 0.1065 | 19  | 145.43 | 7318.6 | 0.0943 |
| 5   | 122.33 | 6155.8 | 0.0895 | 10  | 128.37 | 6459.9 | 0.1138 | 15  | 132.90 | 6688.0 | 0.0793 | 20  | 152.17 | 7657.5 | 0.0645 |
|     |        |        |        |     |        |        |        |     |        |        |        | 21  | 160.13 | 8058.4 | 0.0948 |

### HRMS of 4-(2-bromobenzyloxy)quinolin-8-yl 4-methylbenzenesulfonate (9)

#### Elemental Composition Report

Single Mass Analysis (displaying only valid results) - displaying only valid results

Tolerance = 3.0 mDa / DBE: min = -0.5, max = 100.0

#### Monoisotopic Mass, Even Electron Ions

387 formula(e) evaluated with 4 results within limits (up to 50 closest results for each mass)

|                 |                 |             |             |             |                          |
|-----------------|-----------------|-------------|-------------|-------------|--------------------------|
| Minimum:        |                 |             |             | -0.5        |                          |
| Maximum:        |                 | 3.0         | 10.0        | 100.0       |                          |
| Mass            | Calc. Mass      | mDa         | PPM         | DBE         | Formula                  |
| <b>484.0208</b> | 484.0216        | -0.8        | -1.6        | 11.5        | C15 H15 N7 O7 Br         |
|                 | <b>484.0218</b> | <b>-1.0</b> | <b>-2.0</b> | <b>14.5</b> | <b>C23 H19 N O4 S Br</b> |
|                 | 484.0191        | 1.7         | 3.5         | 15.5        | C19 H15 N7 O2 S Br       |
|                 | 484.0184        | 2.4         | 5.0         | 19.5        | C26 H15 N O4 Br          |

#### J254

LCT-24762 24 (0.482) AM (Cen,2, 70.00, Ar,5000.0,556.28); Sm (SG, 1x2.00); Sb (4,40.00 )

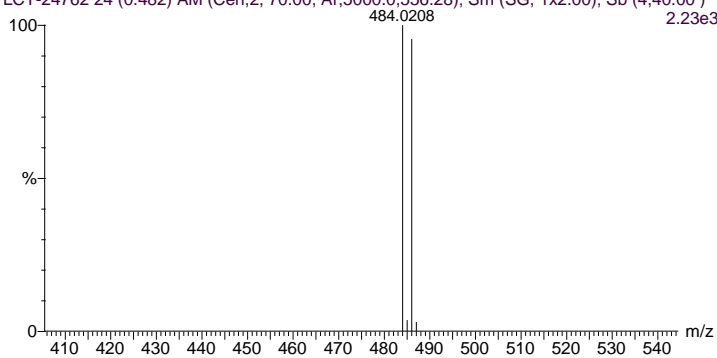

<sup>1</sup>H NMR spectrum of 6*H*-isochromeno[4,3-*c*]quinolin-1-yl 4-methylbenzenesulfonate (**10**)

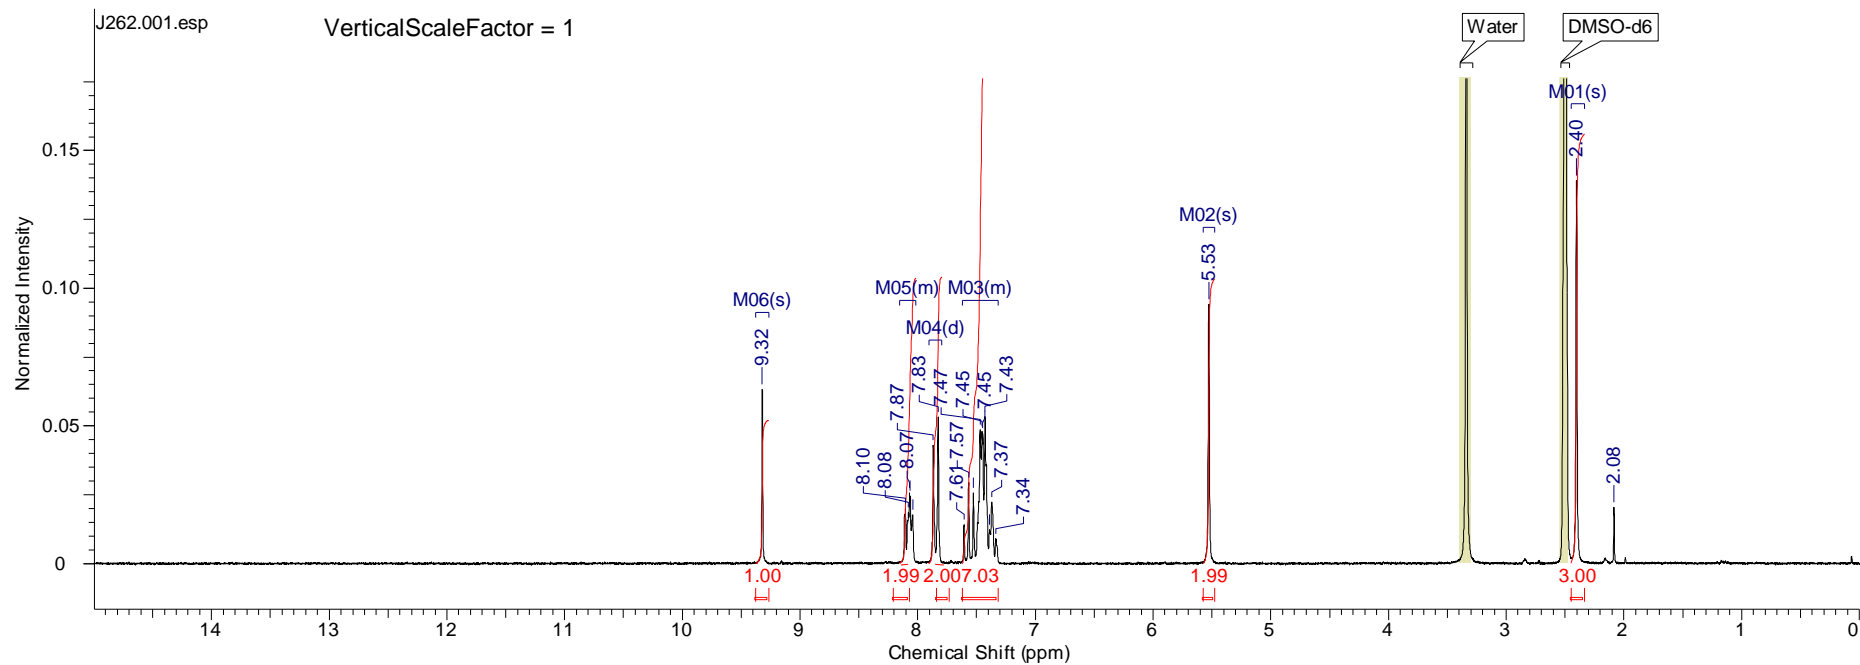

| No. | Shift1 (ppm) | H's | Type | J (Hz) | Multiplet1 | (ppm)          |
|-----|--------------|-----|------|--------|------------|----------------|
| 1   | 2.40         | 3   | s    | -      | M01        | [2.34 .. 2.45] |
| 2   | 5.53         | 2   | s    | -      | M02        | [5.47 .. 5.58] |
| 3   | 7.47         | 7   | m    | -      | M03        | [7.32 .. 7.62] |
| 4   | 7.85         | 2   | d    | 8.22   | M04        | [7.79 .. 7.90] |
| 5   | 8.08         | 2   | m    | -      | M05        | [8.02 .. 8.15] |
| 6   | 9.32         | 1   | s    | -      | M06        | [9.26 .. 9.38] |

<sup>13</sup>C NMR spectrum of 6*H*-isochromeno[4,3-*c*]quinolin-1-yl 4-methylbenzenesulfonate (**10**)

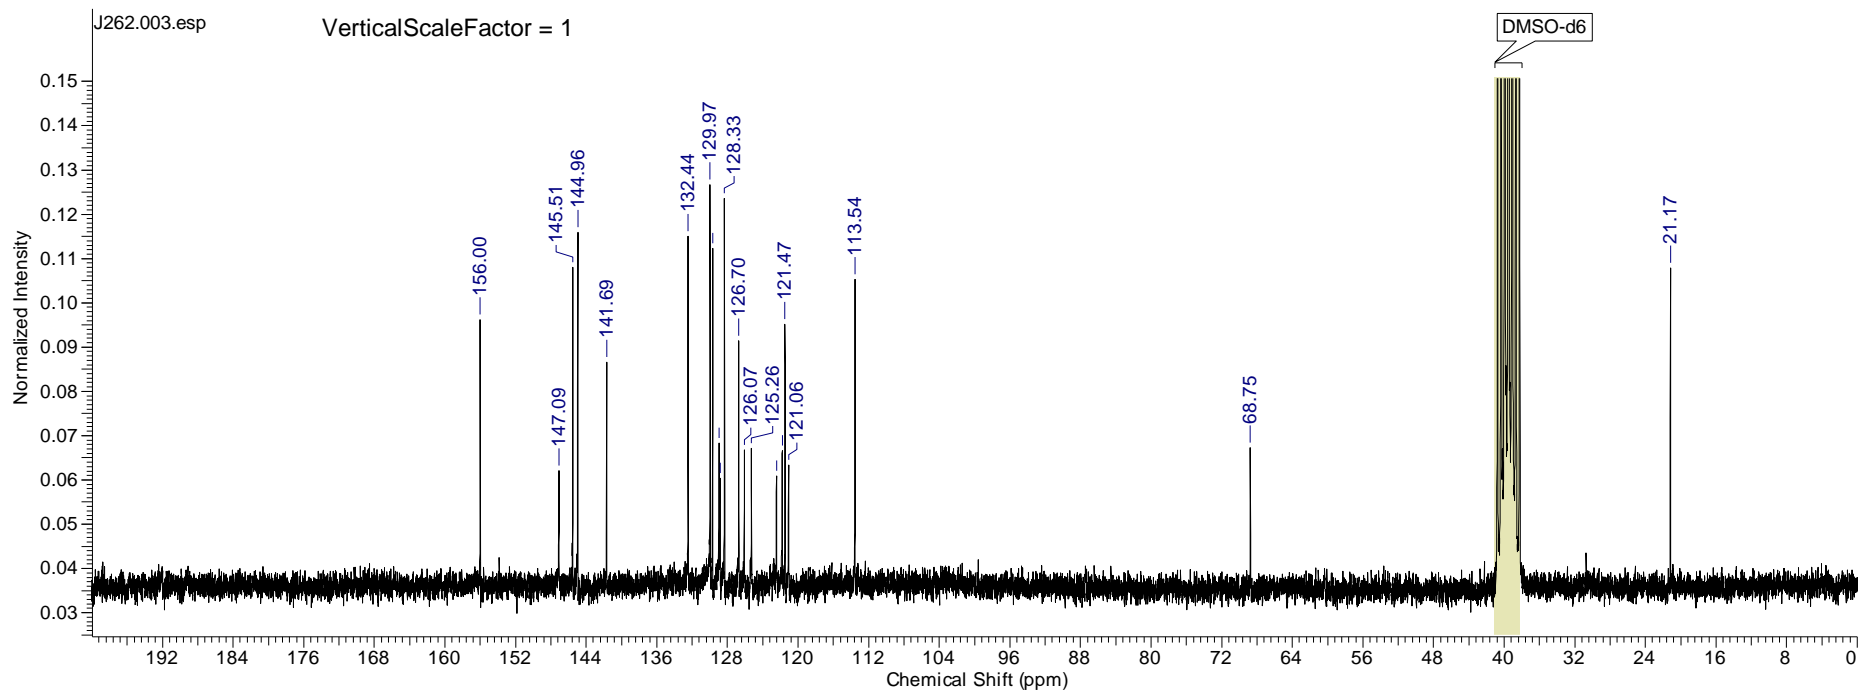

| No. | (ppm)  | (Hz)   | Height |
|-----|--------|--------|--------|-----|--------|--------|--------|-----|--------|--------|--------|-----|--------|--------|--------|
| 1   | 21.17  | 1065.4 | 0.1079 | 6   | 121.79 | 6128.7 | 0.0667 | 11  | 128.33 | 6457.7 | 0.1235 | 16  | 132.44 | 6664.9 | 0.1150 |
| 2   | 68.75  | 3459.8 | 0.0673 | 7   | 122.44 | 6161.3 | 0.0609 | 12  | 128.83 | 6483.0 | 0.0604 | 17  | 141.69 | 7130.4 | 0.0867 |
| 3   | 113.54 | 5713.8 | 0.1053 | 8   | 125.26 | 6303.6 | 0.0671 | 13  | 128.94 | 6488.5 | 0.0683 | 18  | 144.96 | 7294.7 | 0.1159 |
| 4   | 121.06 | 6092.0 | 0.0633 | 9   | 126.07 | 6344.3 | 0.0668 | 14  | 129.67 | 6525.5 | 0.1123 | 19  | 145.51 | 7322.2 | 0.1080 |
| 5   | 121.47 | 6112.9 | 0.0951 | 10  | 126.70 | 6375.9 | 0.0913 | 15  | 129.97 | 6540.2 | 0.1267 | 20  | 147.09 | 7401.8 | 0.0621 |
|     |        |        |        |     |        |        |        |     |        |        |        | 21  | 156.00 | 7850.4 | 0.0962 |



HRMS of 6*H*-isochromeno[4,3-*c*]quinolin-1-yl 4-methylbenzenesulfonate (**10**)

Elemental Composition Report

Single Mass Analysis (displaying only valid results)

Tolerance = 5.0 mDa / DBE: min = -0.5, max = 100.0

Monoisotopic Mass, Even Electron Ions

393 formula(e) evaluated with 7 results within limits (up to 50 closest results for each mass)

|                 |                 |             |             |             |                       |
|-----------------|-----------------|-------------|-------------|-------------|-----------------------|
| Minimum:        |                 |             |             | -0.5        |                       |
| Maximum:        | 5.0             | 10.0        | 100.0       |             |                       |
| Mass            | Calc. Mass      | mDa         | PPM         | DBE         | Formula               |
| <b>404.0950</b> | 404.0955        | -0.4        | -1.1        | 12.5        | C15 H14 N7 O7         |
|                 | <b>404.0957</b> | <b>-0.6</b> | <b>-1.5</b> | <b>15.5</b> | <b>C23 H18 N O4 S</b> |
|                 | 404.0930        | 2.1         | 5.1         | 16.5        | C19 H14 N7 O2 S       |
|                 | 404.0923        | 2.7         | 6.8         | 20.5        | C26 H14 N O4          |
|                 | 404.0916        | 3.4         | 8.4         | 11.5        | C18 H18 N3 O6 S       |
|                 | 404.0988        | -3.8        | -9.4        | 7.5         | C12 H18 N7 O7 S       |
|                 | 404.0995        | -4.5        | -11.0       | 16.5        | C20 H14 N5 O5         |

**J255**

lct-24826 40 (0.804) AM (Cen,2, 65.00, Ar,5000.0,556.28); Sm (SG, 1x2.00); Sb (4,40.00); Sb  
5.37e3

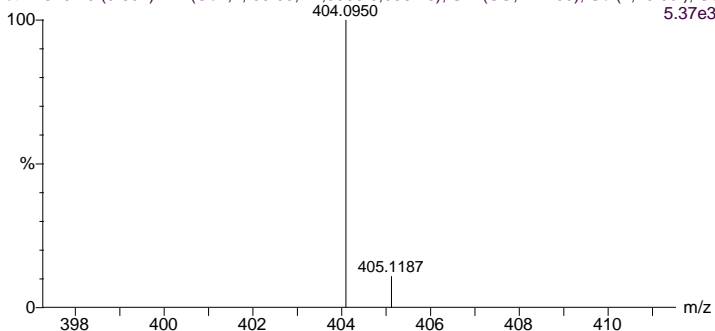

<sup>1</sup>H NMR spectrum of 6*H*-isochromeno[4,3-*c*]quinolin-1-ol (**11**)

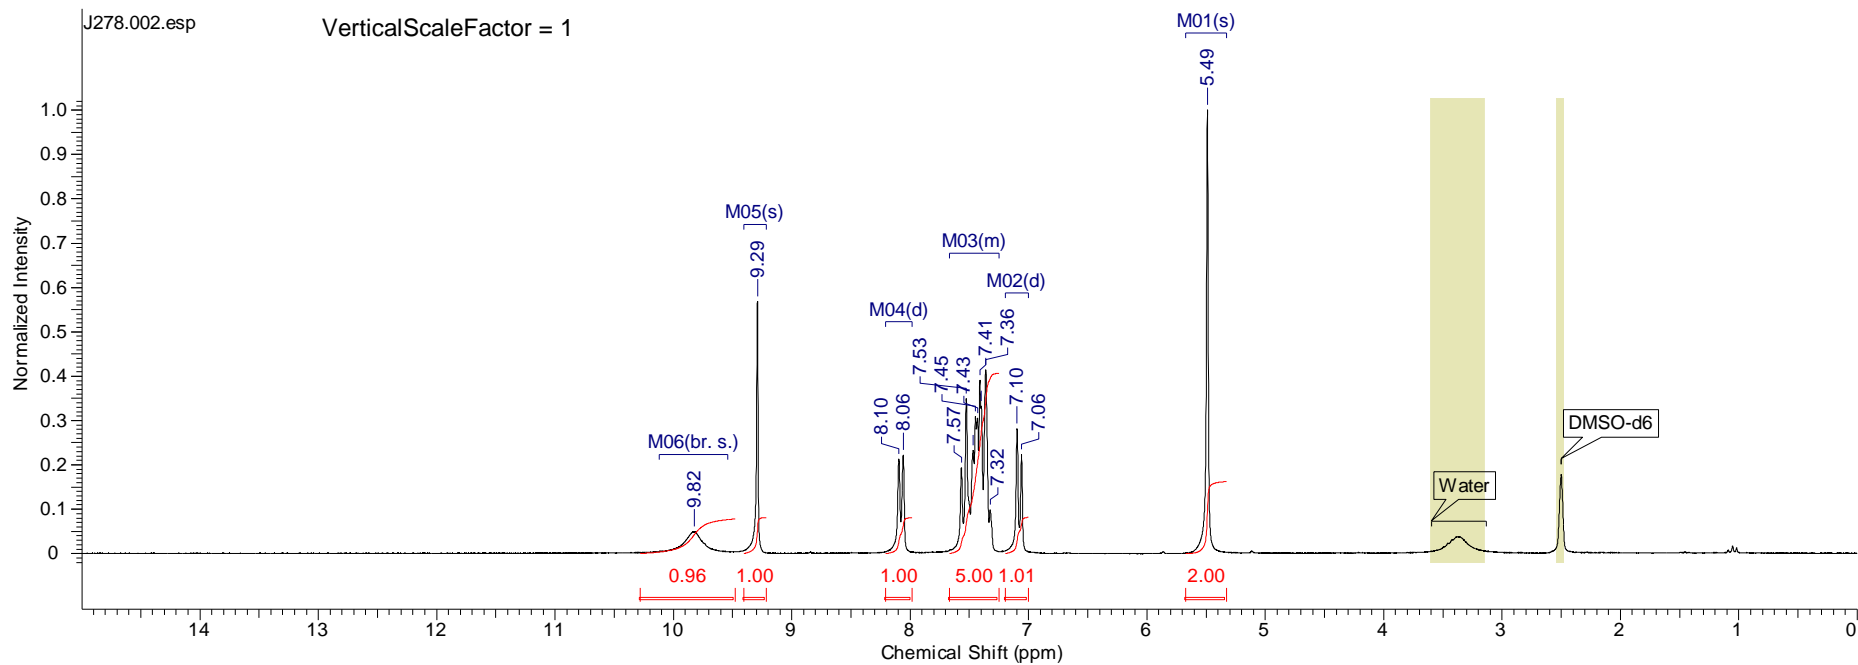

| No. | Shift1 (ppm) | H's | Type   | J (Hz) | Multiplet1 | Connections | (ppm)           |
|-----|--------------|-----|--------|--------|------------|-------------|-----------------|
| 1   | 5.49         | 2   | s      | -      | M01        | -           | [5.33 .. 5.67]  |
| 2   | 7.08         | 1   | d      | 7.43   | M02        | M04         | [7.00 .. 7.20]  |
| 3   | 7.44         | 5   | m      | -      | M03        | -           | [7.25 .. 7.67]  |
| 4   | 8.08         | 1   | d      | 7.24   | M04        | M02         | [7.98 .. 8.21]  |
| 5   | 9.29         | 1   | s      | -      | M05        | -           | [9.22 .. 9.41]  |
| 6   | 9.82         | 1   | br. s. | -      | M06        | -           | [9.54 .. 10.12] |

<sup>13</sup>C NMR spectrum of 6*H*-isochromeno[4,3-*c*]quinolin-1-ol (**11**)

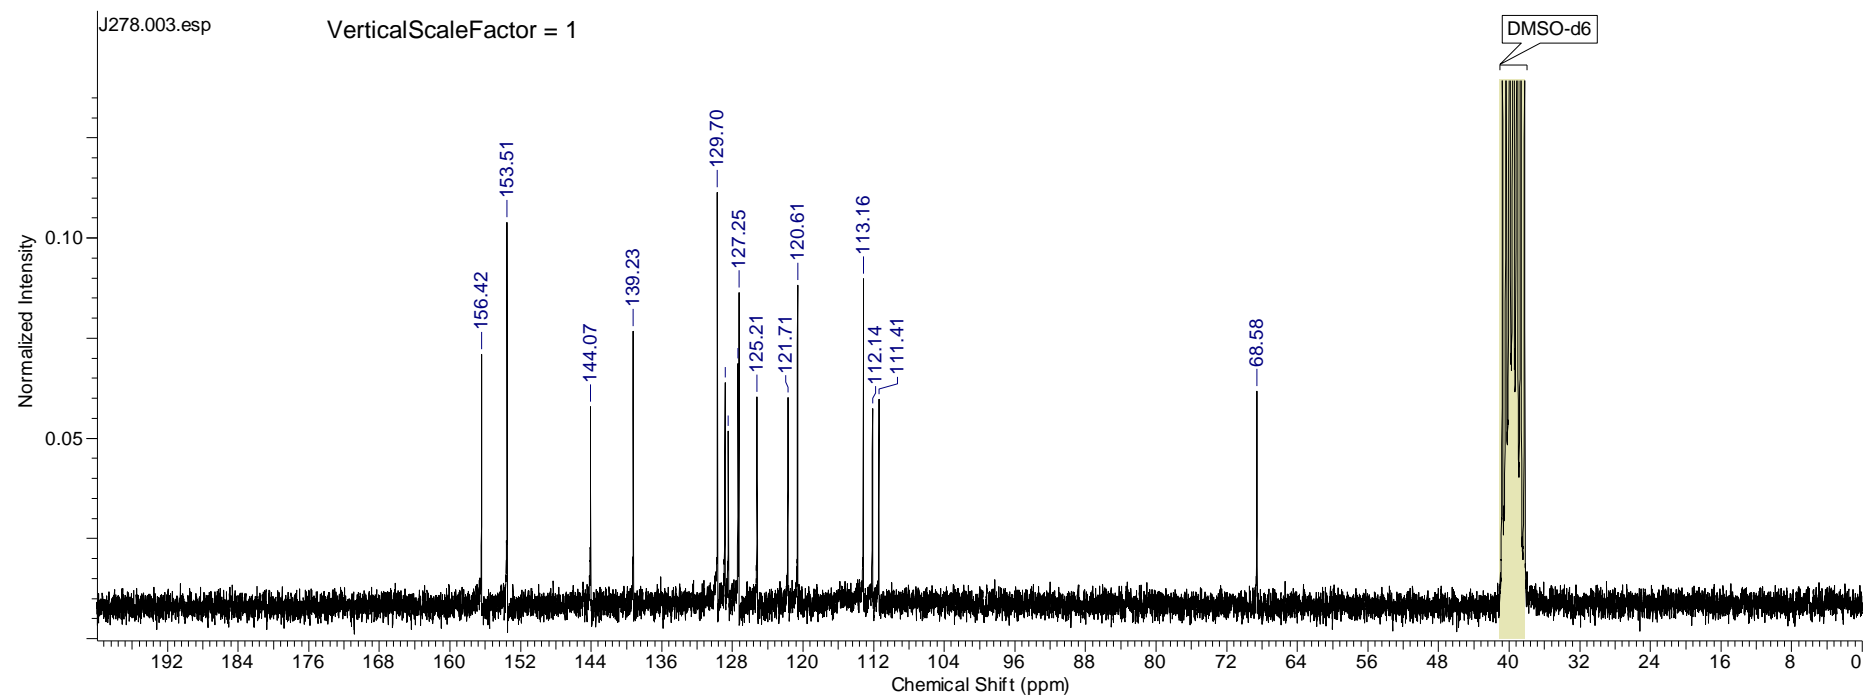

| No. | (ppm)  | (Hz)   | Height |
|-----|--------|--------|--------|-----|--------|--------|--------|-----|--------|--------|--------|-----|--------|--------|--------|
| 1   | 68.58  | 3451.0 | 0.0617 | 5   | 120.61 | 6069.6 | 0.0883 | 9   | 127.36 | 6408.9 | 0.0686 | 13  | 139.23 | 7006.4 | 0.0767 |
| 2   | 111.41 | 5606.3 | 0.0598 | 6   | 121.71 | 6124.6 | 0.0602 | 10  | 128.46 | 6464.7 | 0.0519 | 14  | 144.07 | 7250.0 | 0.0579 |
| 3   | 112.14 | 5643.0 | 0.0575 | 7   | 125.21 | 6300.7 | 0.0603 | 11  | 128.84 | 6483.4 | 0.0639 | 15  | 153.51 | 7725.0 | 0.1039 |
| 4   | 113.16 | 5694.7 | 0.0898 | 8   | 127.25 | 6403.8 | 0.0863 | 12  | 129.70 | 6526.6 | 0.1114 | 16  | 156.42 | 7871.3 | 0.0710 |

### HRMS of 6*H*-isochromeno[4,3-*c*]quinolin-1-ol (**11**)

#### Elemental Composition Report

Single Mass Analysis (displaying only valid results)

Tolerance = 5.0 mDa / DBE: min = -0.5, max = 100.0

#### Monoisotopic Mass, Even Electron Ions

106 formula(e) evaluated with 2 results within limits (up to 50 closest results for each mass)

|                 |                 |            |            |             |                     |
|-----------------|-----------------|------------|------------|-------------|---------------------|
| Minimum:        |                 |            |            | -0.5        |                     |
| Maximum:        |                 | 5.0        | 10.0       | 100.0       |                     |
| Mass            | Calc. Mass      | mDa        | PPM        | DBE         | Formula             |
| <b>250.0873</b> | <b>250.0868</b> | <b>0.5</b> | <b>2.1</b> | <b>11.5</b> | <b>C16 H12 N O2</b> |
|                 | 250.0828        | 4.5        | 18.2       | 7.5         | C11 H12 N3 O4       |

#### J259

LCT-24905 280 (5.604) AM (Cen,2, 70.00, Ar,5000.0,556.28); Sm (SG, 1x2.00); Sb (4,40.00 )  
1.14e3

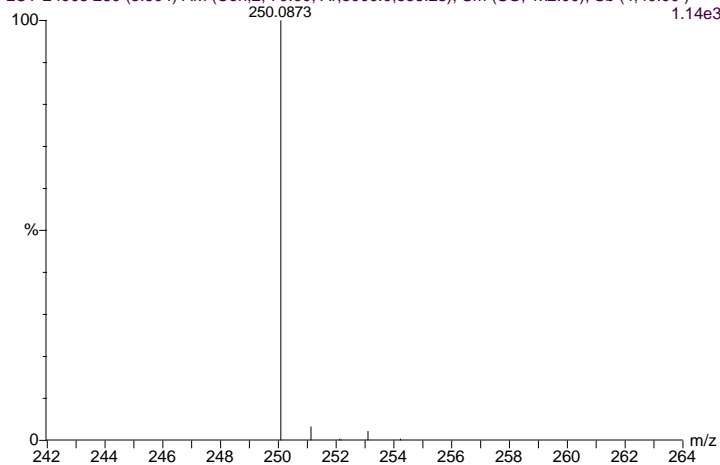

<sup>1</sup>H NMR of tris-(1*H*-indolo[3,2-*c*]quinolin-4-ol)aluminum (**12**)

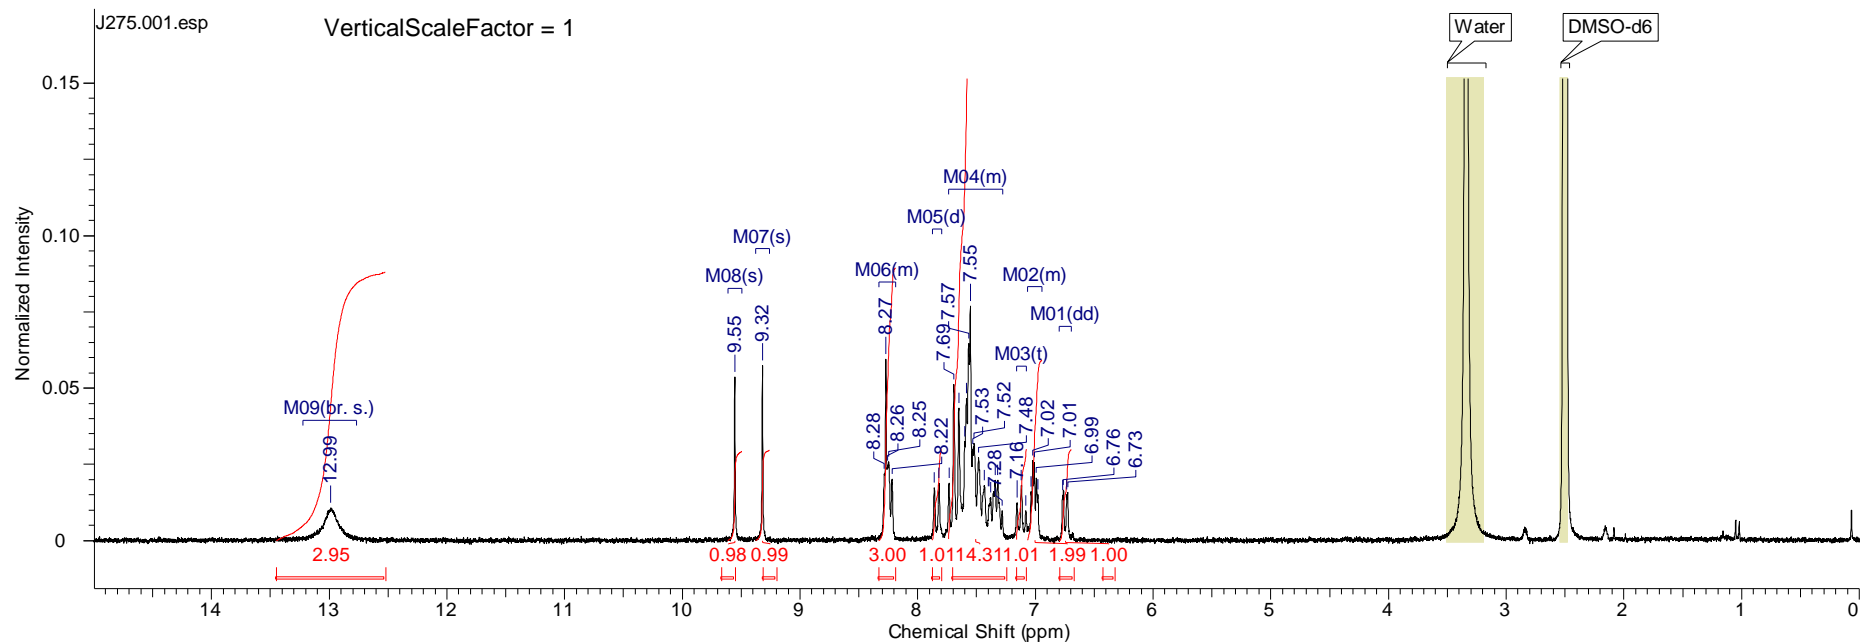

| No. | Shift1 (ppm) | H's | Type   | J (Hz)     | Multiplet1 | (ppm)            |
|-----|--------------|-----|--------|------------|------------|------------------|
| 1   | 6.75         | 1   | dd     | 7.14, 1.27 | M01        | [6.69 .. 6.80]   |
| 2   | 7.01         | 2   | m      | -          | M02        | [6.94 .. 7.06]   |
| 3   | 7.12         | 1   | t      | 7.43       | M03        | [7.08 .. 7.16]   |
| 4   | 7.51         | 14  | m      | -          | M04        | [7.28 .. 7.74]   |
| 5   | 7.84         | 1   | d      | 8.02       | M05        | [7.80 .. 7.87]   |
| 6   | 8.26         | 3   | m      | -          | M06        | [8.19 .. 8.33]   |
| 7   | 9.32         | 1   | s      | -          | M07        | [9.26 .. 9.38]   |
| 8   | 9.55         | 1   | s      | -          | M08        | [9.50 .. 9.61]   |
| 9   | 12.99        | 3   | br. s. | -          | M09        | [12.77 .. 13.23] |

### HRMS of tris-(11*H*-indolo[3,2-*c*]quinolin-4-ol)aluminum (**12**)

#### Elemental Composition Report

Single Mass Analysis (displaying only valid results)

Tolerance = 5.0 mDa / DBE: min = -0.5, max = 100.0

#### Monoisotopic Mass, Odd and Even Electron Ions

616 formula(e) evaluated with 8 results within limits (up to 50 closest results for each mass)

| Minimum:        |                 |             |             |             |                            |
|-----------------|-----------------|-------------|-------------|-------------|----------------------------|
| Maximum:        | 5.0             | 10.0        | 100.0       |             |                            |
| Mass            | Calc. Mass      | mDa         | PPM         | DBE         | Formula                    |
| <b>749.1842</b> | 749.1850        | -0.8        | -1.1        | 46.5        | C58 H26 Al                 |
|                 | <b>749.1858</b> | <b>-1.6</b> | <b>-2.1</b> | <b>35.5</b> | <b>C45 H27 N6 O3 Na Al</b> |
|                 | 749.1826        | 1.6         | 2.2         | 43.5        | C56 H27 Na Al              |
|                 | 749.1871        | -2.9        | -3.9        | 35.0        | C47 H29 N3 O4 Na Al        |
|                 | 749.1810        | 3.2         | 4.3         | 42.5        | C53 H26 N2 O2 Al           |
|                 | 749.1882        | -4.0        | -5.3        | 38.5        | C47 H26 N6 O3 Al           |
|                 | 749.1885        | -4.3        | -5.7        | 40.0        | C48 H25 N7 Na Al           |

#### J275

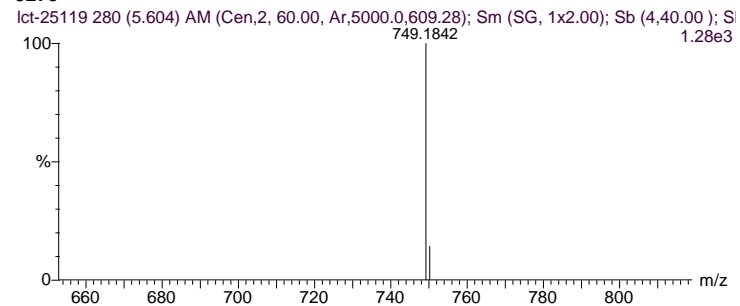

$^1\text{H}$  NMR of tris-(5-methyl-5,6-dihydrodibenzo[*c,h*][1,6]naphthyridin-1-ol)aluminum (**13**)

Due to overlapping peaks and poor solubility of the studied compound,  $^1\text{H}$  NMR spectrum was measured both in  $\text{CDCl}_3$  and  $\text{DMSO-}d_6$ .

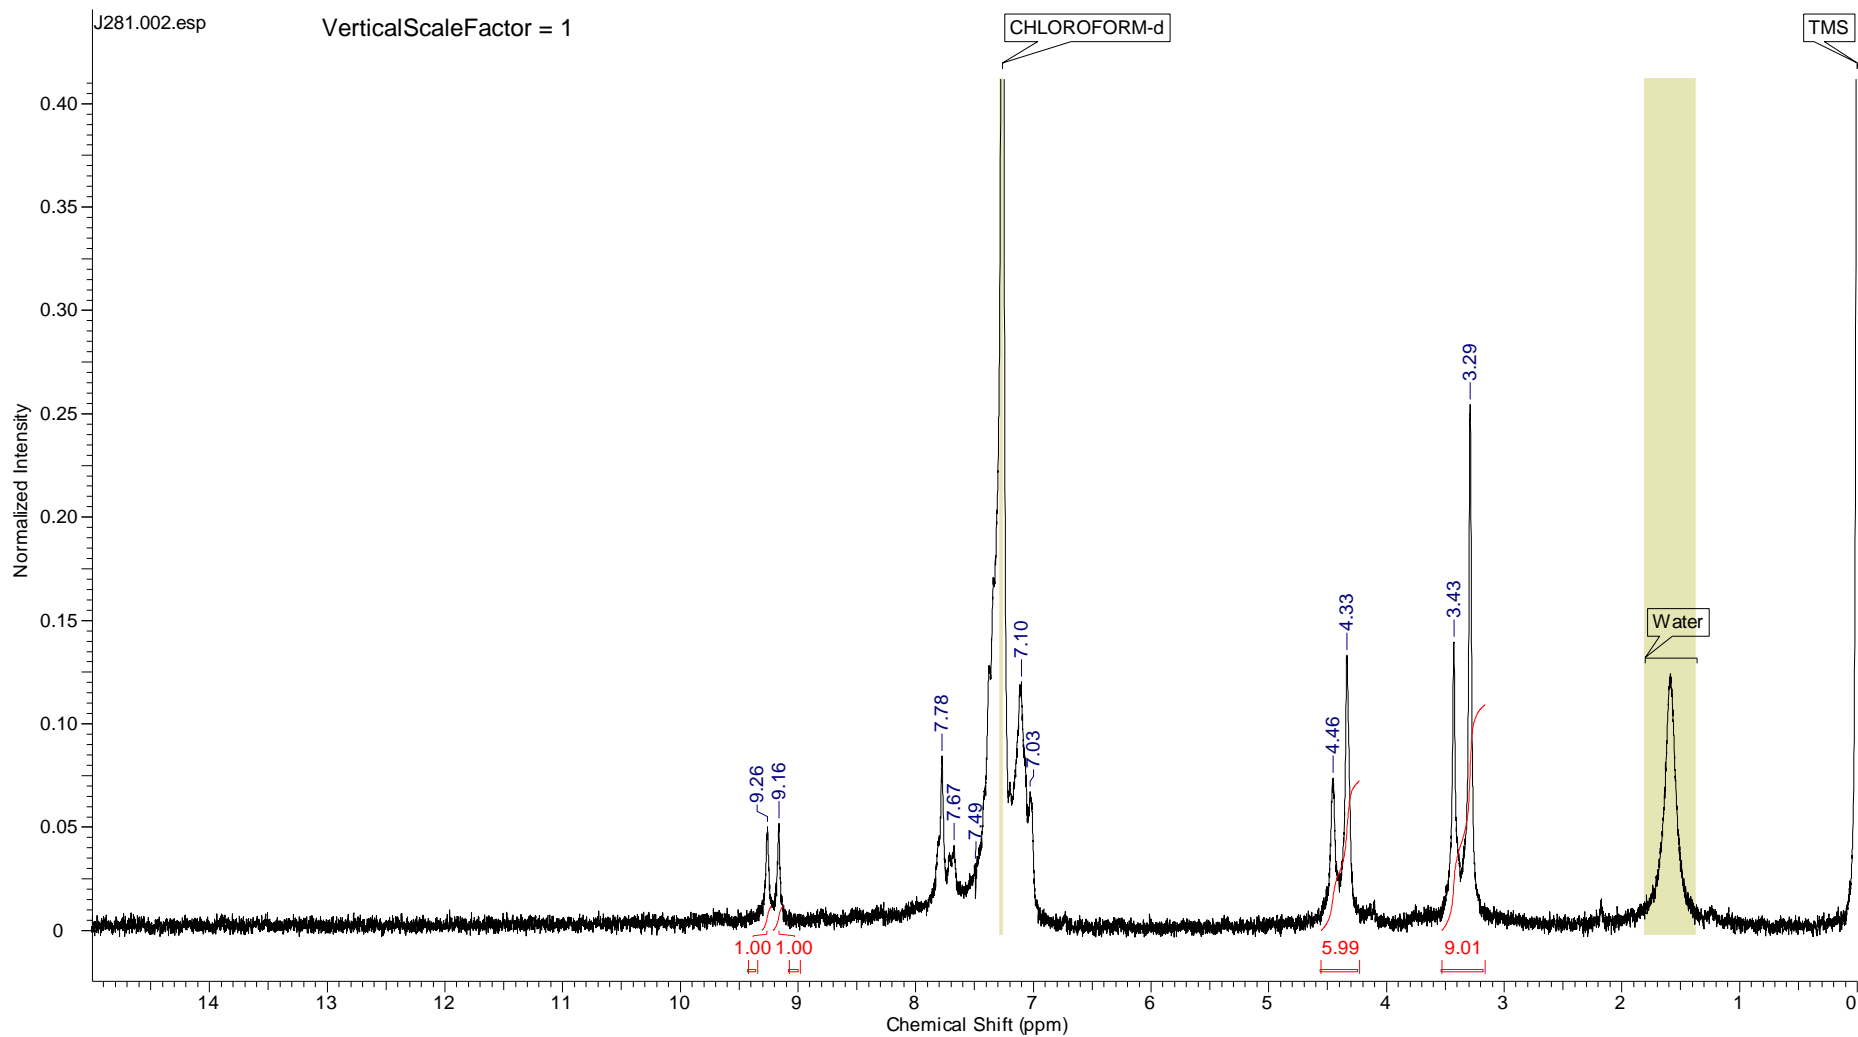

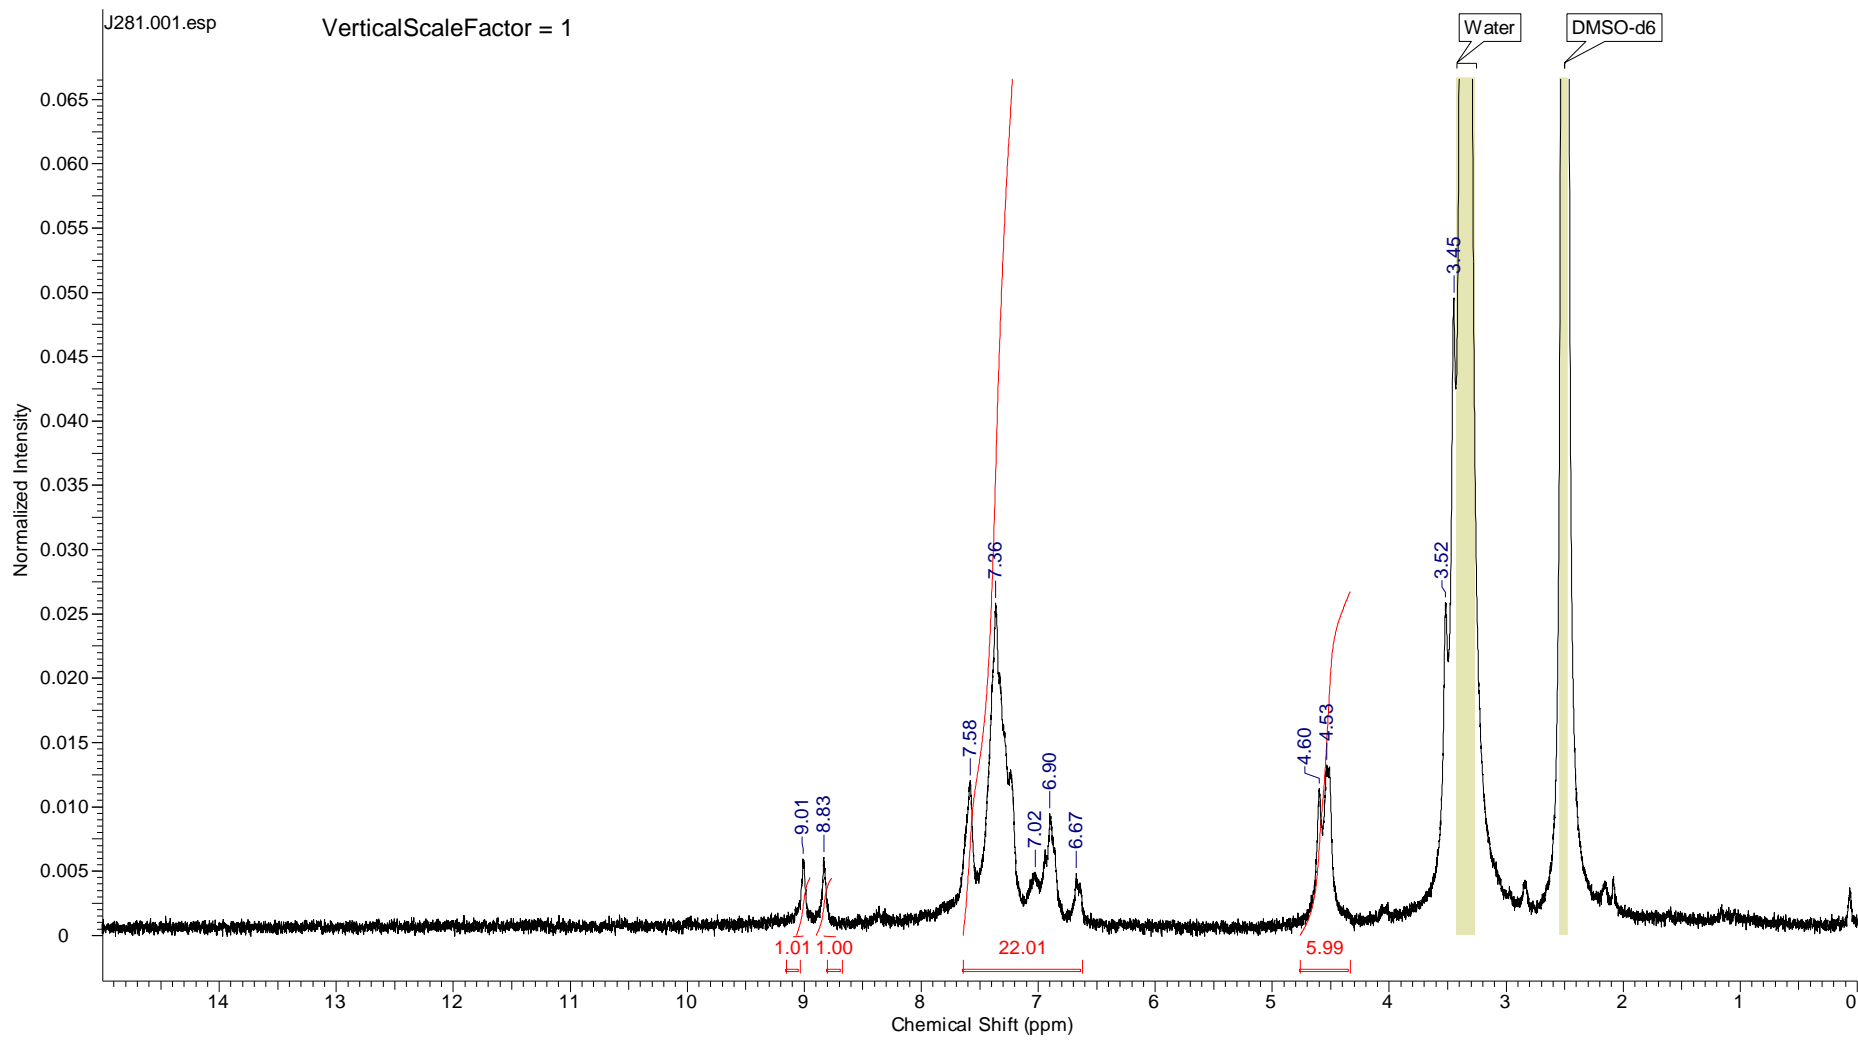



### HRMS of tris-(5-methyl-5,6-dihydrodibenzo[*c,h*][1,6]naphthyridin-1-ol)aluminum (**13**)

#### Elemental Composition Report

Single Mass Analysis (displaying only valid results) - displaying only valid results

Tolerance = 5.0 mDa / DBE: min = -0.5, max = 100.0

#### Monoisotopic Mass, Odd and Even Electron Ions

232 formula(e) evaluated with 4 results within limits (up to 50 closest results for each mass)

|                 |                 |            |            |             |                         |
|-----------------|-----------------|------------|------------|-------------|-------------------------|
| Minimum:        |                 |            |            | -0.5        |                         |
| Maximum:        |                 | 5.0        | 10.0       | 100.0       |                         |
| Mass            | Calc. Mass      | mDa        | PPM        | DBE         | Formula                 |
| <b>811.2981</b> | 811.2980        | 0.1        | 0.1        | 37.0        | C52 H39 N7 Na Al        |
|                 | <b>811.2977</b> | <b>0.4</b> | <b>0.5</b> | <b>35.5</b> | <b>C51 H40 N6 O3 Al</b> |
|                 | 811.3004        | -2.3       | -2.9       | 40.0        | C54 H38 N7 Al           |
|                 | 811.2953        | 2.8        | 3.4        | 32.5        | C49 H41 N6 O3 Na Al     |

#### J281

Ict-25009 347 (6.944) AM (Cen,2, 80.00, Ar,5000.0,609.28); Sm (SG, 1x2.00); Sb (4,40.00 ); S  
2.23e3

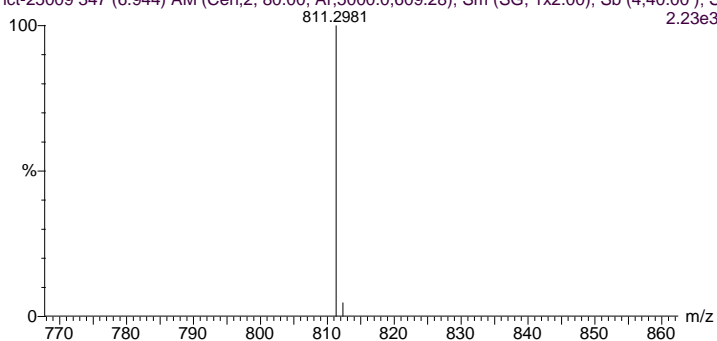

<sup>1</sup>H NMR of tris-(6*H*-isochromeno[4,3-*c*]quinolin-1-ol)aluminum (**14**)

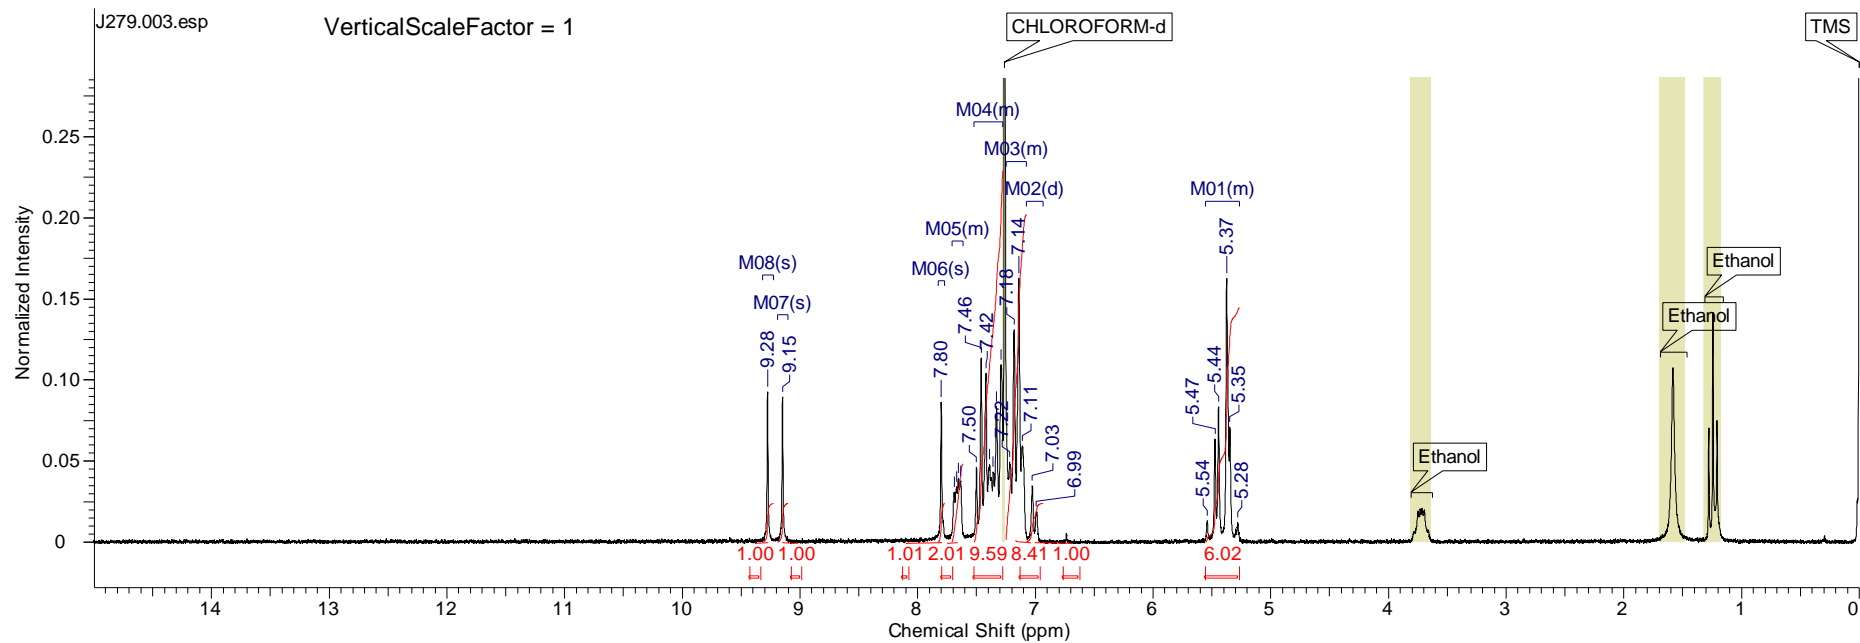

| No. | Shift1 (ppm) | H's | Type | J (Hz) | Multiplet1 | (ppm)          |
|-----|--------------|-----|------|--------|------------|----------------|
| 1   | 5.41         | 6   | m    | -      | M01        | [5.26 .. 5.55] |
| 2   | 7.01         | 1   | d    | 6.80   | M02        | [6.93 .. 7.08] |
| 3   | 7.16         | 9   | m    | -      | M03        | [7.08 .. 7.25] |
| 4   | 7.39         | 10  | m    | -      | M04        | [7.28 .. 7.52] |
| 5   | 7.66         | 2   | m    | -      | M05        | [7.62 .. 7.71] |
| 6   | 7.80         | 1   | s    | -      | M06        | [7.77 .. 7.82] |
| 7   | 9.15         | 1   | s    | -      | M07        | [9.10 .. 9.19] |
| 8   | 9.28         | 1   | s    | -      | M08        | [9.23 .. 9.32] |

### HRMS of tris-(6*H*-isochromeno[4,3-*c*]quinolin-1-ol)aluminum (**14**)

#### Elemental Composition Report

Single Mass Analysis (displaying only valid results)

Tolerance = 5.0 mDa / DBE: min = -0.5, max = 100.0

#### Monoisotopic Mass, Odd and Even Electron Ions

604 formula(e) evaluated with 10 results within limits (up to 50 closest results for each mass)

|                 |                 |            |            |             |                            |
|-----------------|-----------------|------------|------------|-------------|----------------------------|
| Minimum:        |                 |            |            | -0.5        |                            |
| Maximum:        | 5.0             | 10.0       | 100.0      |             |                            |
| Mass            | Calc. Mass      | mDa        | PPM        | DBE         | Formula                    |
| <b>794.1868</b> | 794.1872        | -0.4       | -0.5       | 38.5        | C50 H29 N3 O6 Al           |
|                 | 794.1861        | 0.7        | 0.8        | 35.0        | C50 H32 O7 Na Al           |
|                 | 794.1875        | -0.7       | -0.9       | 40.0        | C51 H28 N4 O3 Na Al        |
|                 | 794.1885        | -1.8       | -2.2       | 38.0        | C52 H31 O7 Al              |
|                 | <b>794.1848</b> | <b>2.0</b> | <b>2.5</b> | <b>35.5</b> | <b>C48 H30 N3 O6 Na Al</b> |
|                 | 794.1888        | -2.0       | -2.6       | 39.5        | C53 H30 N O4 Na Al         |
|                 | 794.1899        | -3.1       | -3.9       | 43.0        | C53 H27 N4 O3 Al           |
|                 | 794.1826        | 4.1        | 5.2        | 47.0        | C59 H27 O2 Al              |
|                 | 794.1912        | -4.4       | -5.6       | 42.5        | C55 H29 N O4 Al            |
|                 | 794.1915        | -4.7       | -5.9       | 44.0        | C56 H28 N2 O Na Al         |

#### J279

LCT-25010 90 (1.801) AM (Cen,2, 70.00, Ar,5000.0,995.31); Sm (SG, 2x2.00); Sb (4,40.00); S  
1.29e3

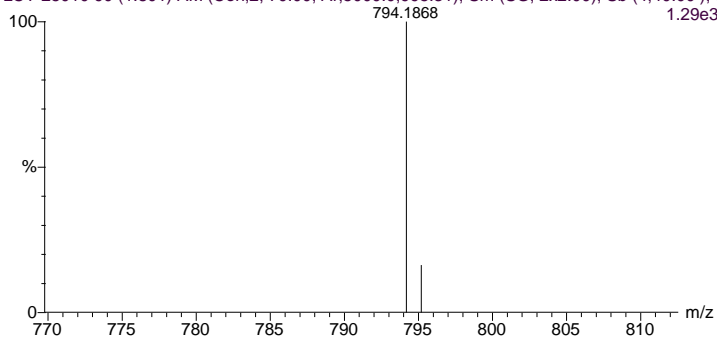

### Fluorescence quantum yield determination in steady state

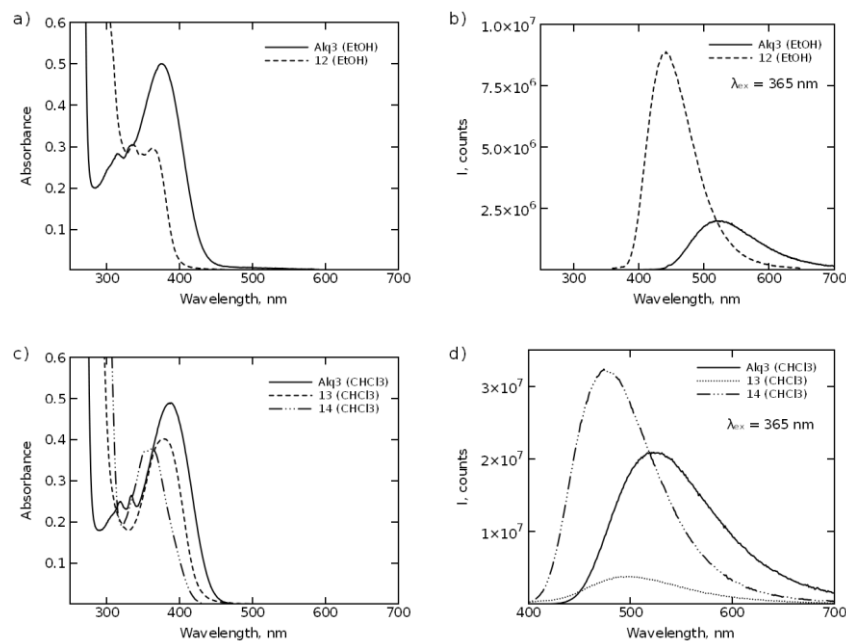

**Figure S1.** Absorption (a and c) and emission (b and d) spectra in absolute scale of the parent Alq<sub>3</sub>, derivative **12** (in ethanol) and derivatives **13** and **14** (in chloroform) solutions. The parent Alq<sub>3</sub> was used as a reference both in chloroform and ethanol. Excitation wavelength was the crossing point in absorption (365 nm), in order to cancel out the effect of transmittance. Therefore, relative fluorescence quantum yield is the ratio of integrated intensity of the sample to the reference throughout the measured range.

Note: In Figure S1c, the transmittances of samples **13**, **14** and the parent Alq<sub>3</sub> at the excitation wavelength (365 nm) are not exactly equal. This was taken into account in the calculation and it turned out, that the contribution rising from this difference is negligible. Experiments were repeated by using solutions of lower concentration, and by using different excitation wavelengths. In each case, the results corresponded very well with the ones presented here.

Fluorescence quantum yield ( $\Phi$ ) in steady state was calculated by using the equation 1:

$$\frac{\Phi}{\Phi_{ref}} = \frac{\int_{\lambda_1}^{\lambda_2} I(\lambda) d\lambda}{\int_{\lambda_1}^{\lambda_2} I_{ref}(\lambda) d\lambda} \times \frac{(1 - T_{ex,ref})}{(1 - T_{ex})} \times \frac{n^2}{n_{ref}^2} \quad (1)$$

$\lambda_1$  and  $\lambda_2$  are determined from the measured wavelength range. Integrals can be estimated as sums of the measured intensities throughout the spectrum (corrected according to the instruments wavelength sensitivity). By selecting the excitation wavelength in a way, that transmittance of the sample equals with the reference ( $T_{ex} = T_{ex,ref}$ ), using the same solvent ( $n = n_{ref}$ ) and normalizing  $\Phi_{ref}$  to 1 (the parent Alq<sub>3</sub>), relative fluorescence quantum yield can be obtained by comparing intensities only (equation 2).

$$\Phi = \frac{\sum_{\lambda_1}^{\lambda_2} I(\lambda)}{\sum_{\lambda_1}^{\lambda_2} I_{ref}(\lambda)} \quad (2)$$

### Fluorescence decays obtained with TCSPC method and calculation of parameters

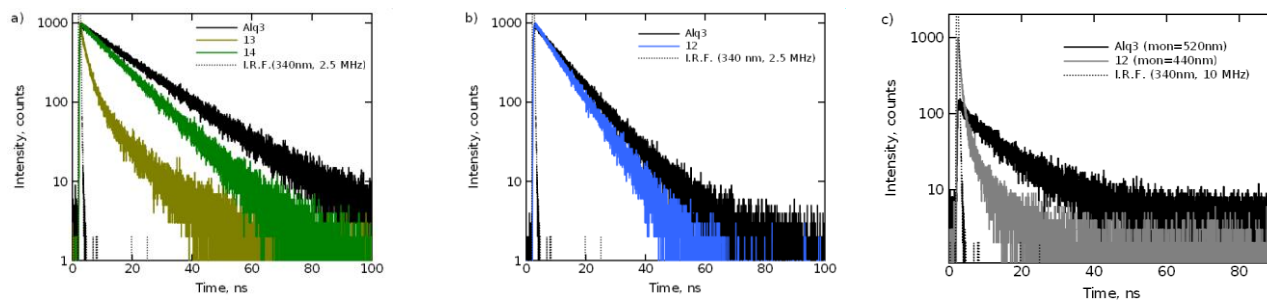

Figure S2. Fluorescence decays of the parent Alq<sub>3</sub> ( $\lambda_{\text{mon}} = 520$  nm) and compounds **13** and **14** ( $\lambda_{\text{mon}} = 490$  nm) in CHCl<sub>3</sub> (a), the parent Alq<sub>3</sub> ( $\lambda_{\text{mon}} = 520$  nm) and compound **12** ( $\lambda_{\text{mon}} = 440$  nm) in ethanol (b) and thin films of the parent Alq<sub>3</sub> and compound **12** (c).

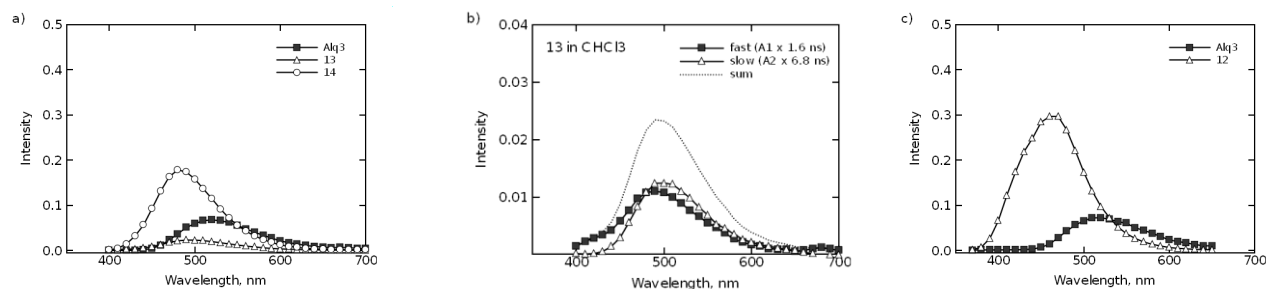

Figure S3. Decay associated spectra of the parent Alq<sub>3</sub> ( $\lambda_{\text{mon}} = 520$  nm) and compounds **13** and **14** ( $\lambda_{\text{mon}} = 490$  nm) in CHCl<sub>3</sub> (a), two components of the compound **13** in CHCl<sub>3</sub> (b), and the parent Alq<sub>3</sub> ( $\lambda_{\text{mon}} = 520$  nm) and compound **12** ( $\lambda_{\text{mon}} = 440$  nm) in ethanol (c).

Relative fluorescence quantum yield can be obtained from decay associated spectrum by comparing the sum intensities ( $I_{\text{sum}}$ , equations 4a and b) of the sample and the reference, and it should correlate with the quantum yield in steady-state ( $\Phi$ ).

Fluorescence decays were fitted to the well known exponential model ( $A$  = Amplitude,  $I$  = Intensity):

$$I_{1\text{-exp}} = A_0 + A_1 e^{-\frac{t}{\tau_1}} \quad (3a)$$

$$I_{n\text{-exp}} = \sum_{i=0}^n (A_i e^{-\frac{t}{\tau_i}}) \quad (3b)$$

Integrating time from zero to infinity, summing the intensities throughout the measured spectrum and by taking transmittance ( $T$ ) of the excitation pulse (340 nm) into account leads to:

$$I_{sum,1\text{-exp}} = \frac{1}{(1-T)} \sum_{\lambda_1}^{\lambda_2} A_1(\lambda) \tau_1 \quad (4a)$$

$$I_{sum,n\text{-exp}} = \frac{1}{(1-T)} \sum_{\lambda_1}^{\lambda_2} \left( \sum_{i=0}^n A_i(\lambda) \tau_i \right) \quad (4b)$$

Constant  $A_0$  was negligible and was therefore excluded from the analysis. In solution, derivative 13 revealed two-exponential decay (equation 4b,  $n = 2$ ), while the decays of the parent Alq<sub>3</sub> and derivatives 12 and 14 were single exponential (equation 4a).

Radiative fluorescence rate constants ( $k_r$ ) were calculated by using equation:

$$k_r = \frac{\Phi}{\tau_F} \quad (5)$$

where  $\Phi$  is an absolute fluorescence quantum yield and  $\tau_F$  fluorescence lifetime.

Non-radiative rate constants ( $k_{nr}$ ) were calculated by using equation:

$$k_{nr} = \frac{1}{\tau_F} - k_r \quad (6)$$
